## 23 **Abstract**

24           Autophagy is an intracellular lysosomal degradative pathway important for tumor  
25 surveillance. Autophagy deficiency can lead to tumorigenesis. Autophagy is also known to be  
26 important for the aggressive growth of tumors, yet the mechanism that sustains the growth of  
27 autophagy-deficient tumors is not known. We previously reported that progression of hepatic  
28 tumors developed in autophagy-deficient livers required high mobility group box 1 (HMGB1)  
29 that is released from autophagy-deficient hepatocytes. However, the mechanism by which  
30 HMGB1 promotes hepatic tumorigenesis is not understood. In this study we examined the  
31 pathological features of the hepatic tumors and the mechanism of HMGB1-mediated  
32 tumorigenesis using liver-specific autophagy-deficient (*Atg7*<sup>-/-</sup>) and *Atg7*<sup>-/-</sup>/*Hmgb1*<sup>-/-</sup> mice. We  
33 found that in *Atg7*<sup>-/-</sup> mice the tumors cells were still deficient in autophagy and could also  
34 release HMGB1. Histological analysis using cell-specific markers suggested that fibroblast and  
35 ductular cells were present only outside the tumor whereas macrophages were present both  
36 inside and outside the tumor. Genetic deletion of HMGB1 or one of its receptors, receptor for  
37 advanced glycated end product (*Rage*), retarded liver tumor development. In addition, we found  
38 that expression of RAGE was only on ductular cells and Kupffer's cells but not on hepatocytes,  
39 which suggested that HMGB1 might promote hepatic tumor growth through a paracrine mode  
40 that altered the tumor microenvironment. Furthermore, HMGB1 and RAGE enhanced the  
41 proliferation capability of the autophagy-deficient hepatocytes and tumors. Finally, RNAseq  
42 analysis of the tumors indicated that HMGB1 induced a much broad changes in tumors. In  
43 particular, genes related to mitochondrial structures or functions were enriched among those  
44 differentially expressed in tumors in the presence or absence of HMGB1, revealing a potential

45 key role of mitochondria in sustaining the growth of autophagy-deficient liver tumors via  
46 HMGB1 stimulation.

47

## 48 **Introduction**

49 Autophagy is an important mechanism regulating tumorigenesis. Its dysfunction due to  
50 external stress or genetic inactivation may lead to tumorigenesis. Indeed, liver-specific deletion  
51 of *Atg5* or *Atg7* causes spontaneous development of liver tumors<sup>1-4</sup>. Similarly, reduced  
52 autophagy from constant activation of mammalian target of rapamycin complex 1 (mTORC1)  
53 also promotes hepatic neoplastic transformation. For example, deletion of phosphatase and tensin  
54 homolog (PTEN) or tuberous sclerosis complex 1 (TSC1) leads to constitutive activation of  
55 mTORC1, and a decrease in autophagic activity, causing spontaneous HCC<sup>5,6</sup>. These studies  
56 suggest that hepatocytes require the tumor-suppressive function of autophagy for maintaining its  
57 homeostasis.

58 Excessive reactive oxygen species (ROS) generated due to autophagy-deficiency is  
59 implicated in tumor development<sup>7,8</sup>. Consequently, pharmacological inhibition of ROS  
60 formation by the antioxidant N-acetylcysteine results in a strong suppression of tumor  
61 development in *Atg5*-deficient liver<sup>8</sup>. Moreover, there is a persistent activation of an anti-  
62 oxidative stress-related transcription factor NFE2L2/ NRF2(nuclear factor, erythroid 2 like 2) to  
63 limit the oxidative injury<sup>9</sup>. Paradoxically, codeletion of *Nrf2* gene also prevents tumorigenesis in  
64 the autophagy-deficient liver<sup>1,3</sup>.

65 On the other hand, autophagy could also regulates hepatic tumorigenesis by modulating  
66 the release of a damage-associated molecular pattern (DAMP) molecule, high mobility group

67 box 1 (HMGB1). Our previous work discovered that defective autophagy leads to the release of  
68 HMGB1, which promotes hepatic tumorigenesis<sup>2</sup>. HMGB1 is an extensively studied non-  
69 histone nuclear protein that facilitates binding of regulatory proteins to DNA and typically  
70 enhances transcriptional activation<sup>10</sup>. It is known that nuclear HMGB1 can be released into the  
71 extracellular environment and acts as an immune mediator in sterile inflammation. However,  
72 codeletion of *Hmgb1* in the autophagy-deficient liver results in delayed tumor development via a  
73 mechanism independent of its usual role in injury, inflammation, and fibrosis<sup>2</sup>. It is thus unclear  
74 how HMGB1 mechanistically promotes hepatic tumorigenesis in autophagy-deficient liver.

75 In the present study, we have characterized the cellular and molecular context of the  
76 hepatic tumors driven by autophagy deficiency. We observed that the tumors were originated  
77 mainly from the autophagy-deficient hepatocytes that had already released HMGB1.  
78 Furthermore, we showed that HMGB1 and its dominant receptor RAGE positively affect the  
79 proliferation of tumor cells. RNA sequencing analysis identified expressional differences in  
80 multiple genes and signaling pathways in tumors derived from *Atg7*<sup>-/-</sup> liver and in tumors  
81 derived from *Atg7*<sup>-/-</sup>/*Hmgb1*<sup>-/-</sup> livers. Our data, therefore, identify a key role of HMGB1 in  
82 autophagy-deficient tumor growth. HMGB1 could thus be a potential therapeutic target.

83

## 84 **Results**

### 85 **1. Hepatic tumor cells in autophagy-deficient livers have features consistent with** 86 **autophagy deficiency.**

87 Autophagy possesses both antitumorigenic and protumorigenic role, depending on  
88 whether it occurs before or after the onset of tumorigenesis. Autophagy-deficient livers develop

89 tumors, confirming the surveillance role of autophagy in the liver. The tumor first appears at the  
90 9-month of the age and the tumor size and the number gradually increase as the mice get older<sup>2,3</sup>.  
91 The tumors in *Atg5*- or *Atg7*- conditional knock out livers seem to be hepatic adenoma, which  
92 does not progress to carcinoma or metastasis stage<sup>3</sup>. However, the molecular and cellular nature  
93 of these tumors had not been fully characterized.

94 We thus examined hepatic tumor from autophagy-deficient mice(*Atg7*<sup>-/-</sup>) mice. Lack of  
95 the ATG7 expression was confirmed in tumor and non-tumor liver tissue from *Atg7*<sup>-/-</sup> mice  
96 when compared to age-matched *Atg7* *F/F* mice (**Figure 1A**). The level of the autophagy  
97 substrate SQSTM1 was also higher in *Atg7*<sup>-/-</sup> tumor as in the non-tumor tissue. Analysis of  
98 LC3B, an autophagy-specific marker showed no formation of LC3B-II in the *Atg7*<sup>-/-</sup> tumor as in  
99 the non-tumor samples (**Figure 1A**). These results indicated that the tumor tissues were also  
100 deficient in autophagy and thus they would have arisen from the autophagy-deficient  
101 hepatocytes. We further confirmed this notion by examining the expression of SQSTM1 and  
102 ubiquitin(UB) in the liver. Immunohistological and immunofluorescence analysis was performed  
103 by taking images of eight different regions covering the non-tumor, peri-tumor, and the tumor  
104 regions as shown in **Figure 1B**. A clear accumulation of SQSTM1 and UB in the tumor region of  
105 the autophagy-deficient liver was observed, which was at the level similar to that in the non-  
106 tumor tissues (**Figure 1C-D**), suggesting that the tumor tissues were defective in autophagy and  
107 had defective protein quality control. In addition, the tumor tissues were all positive for the  
108 hepatocyte-specific marker, HNF4 $\alpha$ , which were colocalized in the same cells that had elevated  
109 SQSTM1 and UB staining (**Figure 1F**).

110 We next analyzed whether the accumulation of SQSTM1 in tumor tissue could activate  
111 the anti-oxidative response-related NRF2 transcription factor as in non-tumor tissues<sup>1,9</sup>. We

112 found that one NRF2 target protein, NQO1, were drastically elevated in the tumor tissues of the  
113 *Atg7*<sup>-/-</sup> mice (**Figure 1A**). The mRNA level of the NRF2 target genes, *Nqo1* and *Gstm1* were  
114 also significantly elevated in the *Atg7*<sup>-/-</sup> samples whether they were from non-tumor or tumor  
115 tissue (**Figure 1G**). These observations indicated that hepatic tumors in autophagy-deficient  
116 livers arise from the autophagy-deficient hepatocytes with alterned NRF2 and SQSTM1 levels.

117

## 118 **2. Hepatic progenitor cells are localized exclusively in the non-tumor region but not inside** 119 **the tumor.**

120 Hepatic progenitor cells(HPC), also known as oval cells or ductular cells, expand during  
121 chronic liver injury in patients and in rodents<sup>11,12</sup>. The expansion of HPCs is significant in the  
122 autophagy-deficient livers<sup>2</sup>. HPC has been noted to possess the capacity to become tumorigenic  
123 in vivo when transduced with H-ras and SV40LT<sup>13</sup>. We thus explored the relationship of these  
124 cells to the tumor in autophagy-deficient livers by examining their spatial interactions.

125 H-E staining showed that the distribution of HPCs was mostly around the tumor-adjacent  
126 region (**Figure 2A**). In the area of tumor tissues, the normal tissue architecture, such as bile duct,  
127 and portal tract formation, was completely lost. Moreover, the tumor region was composed of  
128 irregular hepatic plates with tumor cells showing large nuclear-cytoplasmic ratio and  
129 occasionally nuclear atypia (**Figure 2A**). Immunostaining for CK19, a common marker for  
130 expanded HPC showed that the hepatic tumors were negative for CK19 (**Figure 2B**). Instead,  
131 most of the CK19 positive cells appear to form a compact sheet surrounding the tumor (**Figure**  
132 **2B**). Further analysis of the HPC distribution using Sox9 as another marker revealed a similar  
133 pattern of distribution exclusively in the peritumor and non-tumor regions (**Figure 2C**). Some of

134 the HPCs were positive for SQSTM1 aggregates although many did not show elevated  
135 SQSTM1(**Supplementary Figure S1A-B**). The possibility that some of this SQSTM1 positive  
136 HPC may be derived from the autophagy-deficient hepatocytes cannot be excluded as such  
137 transdifferentiation had been reported previously <sup>11,14</sup>.

138 Interestingly, HPC and liver cancer stem cells (CSC) also share several cellular markers  
139 <sup>15</sup>. Markers such as EpCAM, CD133, and CD24 have been used for isolating CSC with stem cell  
140 features <sup>15,16</sup>. HPC in the context of chronic liver injury has also been considered as one possible  
141 origin of liver CSC. We thus analyzed the expression of these CSC markers in the non-tumor and  
142 tumor tissues of the autophagy-deficient liver. Real-time PCR analysis showed that the  
143 expression of *Cd133*, *Cd200*, *Cd34*, *Cd44*, *Ly6a/Sca1*, and *Ly6d* were significantly upregulated  
144 in *Atg7*<sup>-/-</sup> liver tissues compared to control *Atg7* *F/F* mice (**Supplementary Figure S2A**). The  
145 elevation of these CSC markers in the tumor tissues also suggested that tumors have a  
146 precursor/stem-cell phenotype. Such induction was not observed with *Cd24a*, and *Cd90*,  
147 suggesting the possible heterogeneity in the CSC in the tumor and non-tumor tissues of *Atg7*<sup>-/-</sup>  
148 mice (**Supplementary Figure S2A**). Interestingly, most of the stemness-related transcription  
149 factors such as *Oct4*, *Nanog*, *Klf4* and *Sox2* were significantly downregulated in *Atg7*<sup>-/-</sup> livers as  
150 compared to *Atg7**F/F* livers (**Supplementary Figure S2B**). The lack of expression of Nanog has  
151 been linked to the adenoma nature of the tumor <sup>17</sup>. These changes were not more significant in  
152 the tumor tissue than in the non-tumor tissues, and thus may not be the mechanisms  
153 discriminating the two types of tissues.

154 HPCs that are mostly detected in peritumoral areas has been reported to express multiple  
155 angiogenic paracrine factors such as vascular endothelial growth factor(VEGF), platelets-derived  
156 growth factor(PDGF), and angiopoietin (ANGPT) in pediatric hepatoblastoma and HCC <sup>18</sup>.

157 These HPCs could interact with pro-tumorigenic cells heterotypically via mitogenic factors. We  
158 thus examined the expression of several angiogenic markers. Real-time PCR analysis indicated  
159 that expression of angiogenic factor *Angpt2* and *Pdgfb* were significantly upregulated in liver  
160 tumor and non-tumor tissues compared to wild-type *Atg7 F/F* mice (**Supplementary Figure S3**).  
161 Such induction was not observed with *Vegfa* and *Angpt1* (**Supplementary Figure S3**),  
162 suggesting the possible heterogeneity in the angiogenic factors acting within the peritumoral  
163 niche of *Atg7*<sup>-/-</sup> mice. Taken together, the distinct separation of the HPC and tumor cells in the  
164 *Atg7*<sup>-/-</sup> liver suggests that the HPC may not evolve into the tumor cells but could contribute to a  
165 tumor microenvironment that affects the tumor development.

166

### 167 **3. Fibrosis is present in the peri-tumor region and encapsulates the tumor.**

168 Development of hepatic tumors are strongly associated with the status of liver fibrosis,  
169 with 80-90% of HCCs developing in the fibrotic or cirrhotic livers<sup>19</sup>. On a cellular level,  
170 fibrogenesis is most significantly mediated by the activation of hepatic stellate cells (HSCs) that  
171 transdifferentiate from Vitamin A-storing pericyte-like cells to alpha-smooth muscle actin ( $\alpha$ -  
172 SMA)-positive, collagen-producing myofibroblasts in response to liver injury. Since liver  
173 fibrosis is one of the earliest events that occur in the autophagy-deficient liver<sup>2</sup>, we examined  
174 how closely the tumor cells were associated with liver fibrosis.

175 Immunostaining analysis indicated that the number of desmin-expressing HSCs was  
176 remarkably increased in *Atg7*<sup>-/-</sup> mice (**Figure 2D**). Unlike the distribution of macrophages, the  
177 desmin positive HSC were absent inside the tumor but were present in the non-tumor and peri-  
178 tumor regions of the liver (**Figure 2D**). Consistent with the increased desmin positive HSCs in



179 peri-tumor and non-tumor region, increased fibrillar collagen deposition was detected by Sirius  
180 Red and Trichome stain in the non-tumor and peri-tumor region (**Figure 2E-F**). Collagen  
181 deposition was notably absent inside the tumor of the autophagy-deficient liver (**Figure 2E-F**).  
182 Taken together, the peri-tumoral desmin positive HSCs may be responsible for the production of  
183 the fibers that encapsulated and demarcated the tumor tissue. It is possible that fibrosis in the  
184 autophagy-deficient liver may play an inhibitory role against tumor infiltration into normal  
185 tissues, thus contributing to the more benign presentation of the tumorigenesis in this setting.

186

#### 187 **4. Macrophages but not other immune cells can be found inside the tumor tissue.**

188 Hepatocellular neoplasia often occurs in the setting of chronic injury and inflammation,  
189 which is present in autophagy-deficient livers<sup>2,20</sup>. Persistent inflammation is also known to  
190 promote and exacerbate malignancy. Among many different types of inflammatory cells, the  
191 tumor-associated macrophage (TAM) is a key component involved in the initiation and  
192 maintenance of tumor cells<sup>21</sup>. Factors secreted by the TAM are thought to contribute to the  
193 initiation and promotion of tumors. Since the identification of inflammatory and immune cells  
194 assists in characterizing the nature of the hepatic tumor and their potential contribution to the  
195 tumor growth, we next examined the distribution of inflammatory and immune cells in the  
196 tumor-bearing *Atg7*<sup>-/-</sup> mice.

197 Immunohistological staining for the hepatic kupffer's cells (F4/80<sup>+</sup>) showed their  
198 presence in both tumoral and non-tumoral regions (**Figure 3A**). In contrast, most of the  
199 myeloperoxidase (MPO)-positive neutrophils, CD3-positive T cells, and CD45R-positive B cells  
200 were absent from the tumoral region but present exclusively in the non-tumor region (**Figure 3B-**

201 **D).** Quantitative RT-PCR also found a strong upregulation of F4/80 and Ly6c expression in 12-  
202 month old *Atg7*<sup>-/-</sup> livers as compared to age-matched *Atg7*<sup>F/F</sup> livers, and there was a further  
203 elevation in tumor tissues (**Figure 3E**). The CD4 mRNA level was modestly elevated but the  
204 CD8 mRNA level was significantly suppressed in the tumor-bearing *Atg7*<sup>-/-</sup> liver (**Figure 3E**).

205 Macrophages can play important roles in regulating hepatocytes proliferation and  
206 survival by secreting cytokines such as tumor necrosis factor- $\alpha$ (TNF $\alpha$ ), IL-6, and IL-1 $\beta$  and  
207 growth factors such as VEGF, hepatocytes growth factors(HGF) and transforming growth  
208 factors(TGFs). TNF $\alpha$  produced by infiltrating macrophages could activate TNF receptor  
209 1(TNFR1)-NF-kB signaling in hepatocytes, resulting in enhanced tumor growth<sup>22</sup>. In contrast  
210 to the presence of infiltrating F4/80 macrophages and elevated expression of F4/80 and Ly6c, the  
211 mRNA expression of a set of inflammatory cytokines such as *TNF $\alpha$* , *IL-6*, *IL-1 $\beta$* , and *IL-17* were  
212 strongly downregulated in the 12-month old tumor-bearing *Atg7*<sup>-/-</sup> liver (**Supplementary Figure**  
213 **S4**). These data suggest that there is ongoing non-resolving inflammation in tumor and non-  
214 tumor tissue of autophagy-deficient mice but their contribution to tumor growth has yet to be  
215 fully determined.

216

## 217 **5. Autophagy deficient hepatic tumor cells release HMGB1.**

218 Autophagy-deficient livers manifest multiple pathological changes, including liver injury,  
219 inflammation, fibrosis, ductular reaction and tumor development<sup>1,2,23</sup>. Moreover, the autophagy-  
220 deficient hepatocytes continuously release HMGB1, an intracellular nuclear DAMP protein, to  
221 impact the expansion of HPC<sup>2</sup>. Given that HMGB1 as a secretory factor could recruit other  
222 hepatic cells such as inflammatory cells or fibrotic cells to the tumor, favoring the buildup of

223 permissive microenvironment<sup>24,25</sup>, we sought to determine whether the tumor tissues also release  
224 HMGB1 similar to the non-tumor autophagy-deficient liver tissue.

225 As anticipated, the immunoblot analyses found that less HMGB1 proteins are present in  
226 tumor and non-tumor tissue of the *Atg7*<sup>-/-</sup> liver, as compared to the *Atg7*<sup>F/F</sup> liver (**Figure 4A**).  
227 Co-immunofluorescence staining of HMGB1 and SQSTM1 also showed that the tumor cells  
228 with the accumulated SQSTM1 were devoid of both nuclear and cytosolic HMGB1 (**Figure 4B**).  
229 The mRNA level of HMGB1 was comparable between the liver tissues of *Atg7*<sup>F/F</sup>, and *Atg7*<sup>-/-</sup>  
230 mice (**Figure 4C**). Thus, the loss of HMGB1 protein in hepatic tumor cells supports further the  
231 notion that the nature of these cells are autophagy-deficient, and suggests that these tumor cells  
232 had released HMGB1, which could affect the microenvironment.

233

## 234 **6. HMGB1 promotes hepatic proliferation.**

235 HMGB1 has a mitogenic effect in many cell lines including in vitro human HCC cell  
236 lines<sup>26</sup>. HMGB1 released by autophagy-deficient hepatocytes could affect the growth of  
237 tumorigenic hepatocytes, thus promoting hepatocarcinogenesis. Indeed we had found that  
238 HMGB1 was important for the tumorigenesis in the autophagy-deficient liver<sup>2</sup>.

239 Consistently, we now found that *Atg7*<sup>-/-</sup> livers had a remarkably increased number of the  
240 hepatocytes positive for Proliferation of cell nuclear antigen (PCNA) (**Figure 5A**). PCNA  
241 positive cells seem to be present in both non-tumor and tumor regions without much differences  
242 in the level. This observation was confirmed by immunostaining for Ki67 positive cells  
243 (**Supplementary Figure S5A-B**). Ki67 positive cells were elevated in non-tumor and intra-

244 tumor regions of the *Atg7*<sup>-/-</sup> liver without differences in the number of proliferating cells  
245 (**Supplementary Figure S5A**).

246 To determine the role of HMGB1 in the proliferation of hepatocyte, we compared the  
247 cellular proliferation in 15-month old *Atg7*<sup>-/-</sup> and *Atg7*<sup>-/-</sup>/*Hmgb1*<sup>-/-</sup> mice because both genotypes  
248 developed a notable but different number of tumors at this age<sup>2</sup>. Immunostaining analysis for  
249 PCNA showed a lower number of proliferating hepatocytes in the tumor of *Atg7*<sup>-/-</sup>/*Hmgb1*<sup>-/-</sup>  
250 livers than those in the *Atg7*<sup>-/-</sup> livers (**Figure 5A**). Interestingly, the number of PCNA positive  
251 cells was also lower in the non-tumor region of *Atg7*<sup>-/-</sup>/*Hmgb1*<sup>-/-</sup> livers when compared to the  
252 non-tumor region of *Atg7*<sup>-/-</sup> livers (**Figure 5A**).

253 Because the increased cellular proliferation is associated with increased expression of  
254 cyclin protein, we next examined the expression of Cyclins. First, immunostaining found that  
255 the expression of Cyclin D1 was more up-regulated in the tumor samples of *Atg7*<sup>-/-</sup> liver than in  
256 the tumors of the *Atg7*<sup>-/-</sup>/*Hmgb1*<sup>-/-</sup> livers (**Figure 5B, Supplementary Figure S6**). Second,  
257 immunoblot analysis of Cyclin E, similar to PCNA protein, also showed a higher level in tumor  
258 and non-tumor regions of the *Atg7*<sup>-/-</sup> livers than that in the *Atg7*<sup>-/-</sup>/*Hmgb1*<sup>-/-</sup> livers (**Figure 5C-**  
259 **D**). Real-time PCR analysis demonstrated that hepatic expression of *CCND1*, *CCNA1*, and  
260 *CCNB1* were significantly up-regulated in *Atg7*<sup>-/-</sup> mice, compared to *Atg7* *F/F* mice(**Figure 5E**).  
261 The expression of *CCND1* and *CCNA1* was even more pronouncedly elevated in the tumor  
262 region than in the non-tumor tissues from *Atg7*<sup>-/-</sup> mice (**Figure 5E**). Such induction was not  
263 observed in tumor tissues from *Atg7*<sup>-/-</sup>/*Hmgb1*<sup>-/-</sup> mice (**Figure 5E**), suggesting that *Hmgb1*  
264 deletion retarded cell cycle progression via the downregulation of the expression of cyclins in  
265 *Atg7*<sup>-/-</sup> mice. These results indicate that hepatic tumors of *Atg7*<sup>-/-</sup>/*Hmgb1*<sup>-/-</sup> are less proliferative

266 than the tumors in *Atg7*<sup>-/-</sup> mice. Thus HMGB1 had an impact on cell proliferation in the  
267 autophagy-deficient liver.

268 We then examined the phosphatidylinositol 3-kinase(PI3K)/AKT signaling pathway that  
269 regulates various cellular responses in HCC proliferation and survival<sup>27,28</sup>. Intriguingly,  
270 immunoblot analysis showed that phospho-AKT was detected at higher levels in *Atg7*<sup>-/-</sup>/*Hmgb1*<sup>-/-</sup>  
271 *-/-* livers compared to *Atg7*<sup>-/-</sup> livers regardless the sample type (**Supplementary Figure S7A**).  
272 The expression level of phospho-glycogen synthase kinase 3 (GSK3) $\beta$ , one of the downstream  
273 target of AKT was also markedly increased in the *Atg7*<sup>-/-</sup>/*Hmgb1*<sup>-/-</sup> livers (**Supplementary**  
274 **Figure S7A**). However, the protein levels of total and phospho-PDK, an upstream regulator of  
275 AKT were comparable between the two genotypes (**Supplementary Figure S7A**). In addition,  
276 we found an increased level of phospho-JNK in *Atg7*<sup>-/-</sup>/*Hmgb1*<sup>-/-</sup> livers as compared to that in  
277 *Atg7*<sup>-/-</sup> livers regardless the sample type (**Supplementary Figure S7B**). JNK can be a dominant  
278 effector of mitogen-activated protein kinase in the liver<sup>29</sup>. JNK catalyzes the phosphorylation of  
279 numerous substrate proteins including the c-Jun transcription factor to regulate the gene  
280 expression. However, the protein expression level of phospho-c-Jun and total-c-Jun were  
281 comparable between the two genotypes (**Supplementary Figure S7B**). The mammalian target of  
282 rapamycin complex 1 (mTORC1) signaling pathway, the mitogen-activated protein  
283 kinase(MAPK)/ERK signaling pathway, and the Janus activated kinase/Signal Transducer and  
284 Activator of Transcription Family or transcription factors (JAK/STAT3) signaling pathway, all  
285 have been associated with cell growth<sup>30-33</sup>. However, we did not detect significant differences in  
286 the activation of these pathways between *Atg7*<sup>-/-</sup> mice and *Atg7*<sup>-/-</sup>/*Hmgb1*<sup>-/-</sup> mice  
287 (**Supplementary Figure S7C-E**). Taken together while the reason for the paradoxical elevation  
288 of AKT and JNK phosphorylation in *Atg7*<sup>-/-</sup>/*Hmgb1*<sup>-/-</sup> livers is not clear these events do not

289 seem to be tumor specific and may not be related to the reduced proliferation status of tumors  
290 from in these livers. Alternativley, it is notable that the hepatocytes could offer a very different  
291 cellular context in which the conventional oncogenes or tumor suppressor genes can act in  
292 opposite ways<sup>34,35</sup>.

293

## 294 **7. RAGE deletion impairs proliferation and retards liver tumor development.**

295 HMGB1 is a non-histone nuclear protein that facilitates the binding of regulatory proteins  
296 to DNA and typically enhances transcriptional activation<sup>10</sup>. When released extracellularly,  
297 HMGB1 can binds to one of its receptors, such as RAGE or TLR4<sup>36</sup>. In our previous study,  
298 *Atg7*<sup>-/-</sup> mice develop hepatic tumors at 9-month old in the liver, which could be inhibited by the  
299 deletion of either *Hmgb1* or *Rage*<sup>2</sup>. While *Atg7*<sup>-/-</sup>/*Hmgb1*<sup>-/-</sup> at the age of 12-month old were still  
300 largely devoid of tumors in the liver<sup>2</sup>, we now found that 12-month old *Atg7*<sup>-/-</sup>/*Rage*<sup>-/-</sup> mice  
301 developed a significant presence of tumors albeit at a level slightly lower than that in the *Atg7*<sup>-/-</sup>  
302 livers (**Figure 6A**). However, hepatic tumors developed in the 12-month old *Atg7*<sup>-/-</sup>/*Rage*<sup>-/-</sup>  
303 mice were significantly smaller in size compared to those in the *Atg7*<sup>-/-</sup> mice (**Figure 6B**). The  
304 data indicate that deletion of *Rage* still delayed the development of tumors in older *Atg7*<sup>-/-</sup> mice  
305 although in a less prominent manner than *Hmgb1* deletion. Notably, the number of PCNA-  
306 positive cells and the expression of cyclin D1 were also remarkably decreased in *Atg7*<sup>-/-</sup>/*Rage*<sup>-/-</sup>  
307 livers compared to that in the *Atg7*<sup>-/-</sup> livers(**Figure 6C-D**). These data suggest that the loss of  
308 RAGE in autophagy-deficient livers reduced tumor cell proliferation and tumor expansion in the  
309 liver. HMGB1 interaction with the RAGE receptor can thus mediate a significant level of cell  
310 proliferation and tumor development in the autophagy-deficient liver.

311 To determine whether HMGB1 released by the autophagy-deficient hepatocytes or  
312 hepatic tumor cells could act as an autocrine fashion to promote cellular proliferation, we  
313 examined whether hepatocytes could express RAGE. Immunofluorescence staining was  
314 performed in frozen tissue from *Atg7 F/F* and *Atg7-/-* liver. We found that RAGE was almost  
315 exclusively expressed by cells other than hepatocytes based on cell morphology, but it was  
316 detected on the cell surface, consistent with its being a receptor molecule (**Figure 7A**). To  
317 examine which non-hepatocytes expressed RAGE, double immunofluorescence staining for  
318 RAGE, together with CK19 or SOX9( for ductular cells), F4/80 (for Kupffer cells), or Desmin  
319 (for stellate cells), was conducted. Colocalization of RAGE was evident in CK19 or SOX9-  
320 positive ductular cells and F4/80-positive Kupffer cells, but not on the Desmin-positive stellate  
321 cells in *Atg7-/-* liver (**Figure 7B**).

322 These findings indicate that RAGE was expressed on ductular cells and Kupffer cells but  
323 not on hepatocytes nor stellate cells. Furthermore, these observations suggest that unlike the  
324 possible direct effect of HMGB1 on the expansion of CK19-positive or SOX9-positive ductular  
325 cells<sup>2</sup>, the tumor-promoting effect of HMGB1 may not be mediated by a direct effect on the  
326 autophagy-deficient hepatocytes, but possibly by an indirect effect through other RAGE-  
327 expressing cells, such as the Kupffer's cells, which could then alter the microenvironment that  
328 facilitate tumor development.

329

330 **8. RNA Sequencing revealed key molecular differences between tumors from *Atg7-/-* mice**  
331 **and from *Atg7-/-/Hmgb1-/-* mice.**

332 Since the effect of HMGB1 in promoting tumor development may be mediated by an  
333 altered microenvironment, there could be multiple alterations in tumor behaviors affected by this  
334 process. We sought to investigate the transcriptomic profile of the tumor to better understand the  
335 impact of HMGB1 on tumor development in autophagy-deficient livers. We chose to perform  
336 RNA sequencing on tumor tissues obtained from *Atg7*<sup>-/-</sup> and *Atg7*<sup>-/-</sup>/*Hmgb1*<sup>-/-</sup> mice at the age of  
337 15 months old, when the tumor number and size were comparable in these mice.

338 The principal component analysis (PCA) on the RNAseq data indicated different  
339 transcriptomic profiles in the tumor tissues of 15-month old *Atg7*<sup>-/-</sup> and *Atg7*<sup>-/-</sup>/*Hmgb1*<sup>-/-</sup> mice  
340 when compared with the non-tumor tissues (**Figure 8A**). The six non-tumor samples from the  
341 two strains of mice were close to each other. In addition, two out of the three tumor samples  
342 from *Atg7*<sup>-/-</sup>/*Hmgb1*<sup>-/-</sup> livers were also close to the non-tumor samples whereas tumor samples  
343 from *Atg7*<sup>-/-</sup> mice were separated the farthest from the rest of the samples. PCA thus suggests  
344 that tumors from the two strains of mice were quite different with those from *Atg7*<sup>-/-</sup>/*Hmgb1*<sup>-/-</sup>  
345 livers more similar to the non-tumor tissues in their transcriptomic profiles.

346 Differential expression analysis showed that 284 and 372 differentially expressed genes  
347 (DEGs) were upregulated in tumors of *Atg7*<sup>-/-</sup> and *Atg7*<sup>-/-</sup>/*Hmgb1*<sup>-/-</sup> livers, respectively,  
348 whereas 326 and 300 genes were downregulated in tumors of these livers, respectively (**Figure**  
349 **8B-C**). A complete list of these DEGs can be found in **Supplementary Tables S1-S5**. We then  
350 focused on discovering unique molecular features in the tumours associated with the presence and  
351 absence of HMGB1. When comparing the DEGs between *Atg7*<sup>-/-</sup> and *Atg7*<sup>-/-</sup>/*Hmgb1*<sup>-/-</sup>, a small  
352 number of up-regulated (28, **Figure 8B**) or down-regulated (12, **Figure 8C**) DEGs were found in  
353 tumor tissues of both *Atg7*<sup>-/-</sup> and *Atg7*<sup>-/-</sup>/*Hmgb1*<sup>-/-</sup> livers. The larger portions of DEGs were,



354 however, unique in *Atg7*<sup>-/-</sup> and in *Atg7*<sup>-/-</sup>/*Hmgb1*<sup>-/-</sup> tumors, supporting that the tumors were  
355 different in the presence or absence of HMGB1.

356 To understand the molecular features of these differences, we determined the Gene  
357 Ontology (GO) terms and KEGG pathways that were significantly enriched in the unique DEG  
358 sets. We found that many biological processes, particularly those associated with mitochondrial  
359 structures or functions were significantly over-represented by the uniquely up-regulated DEGs  
360 in *Atg7*<sup>-/-</sup> tumors (**Figure 8D**). Notably, DEGs down-regulated uniquely in *Atg7*<sup>-/-</sup>/*Hmgb1*<sup>-/-</sup>  
361 tumors were also enriched for those involved in the mitochondrial structures or functions,  
362 (**Figure 8F**). Many genes related to mitochondrial oxidative phosphorylation (OXPHOS) or  
363 electron transport chain (ETC) process were significantly downregulated in the tumors of *Atg7*<sup>-/-</sup>/  
364 *Hmgb1*<sup>-/-</sup> liver. Particularly, the genes involved in the assembly or biogenesis of respiratory  
365 complex I (NADH dehydrogenase complex) and complex III (Ubiquinol to Cytochrome c  
366 electron transporter) were significantly downregulated. These observations suggested that a  
367 major component of the tumor-promoting effects of HMGB1 could be related to mitochondrial  
368 function and activity, which may impact the cellular bioenergetics and hence tumor growth in  
369 autophagy-deficient liver.

## 370 **Discussion**

371 Autophagy is important for liver homeostasis and tumor surveillance. Deficiency of  
372 hepatic autophagy, such as that caused by the liver-specific deletion of *Atg5* or *Atg7*, leads to  
373 tumor development in aged mice<sup>1-4</sup>. On the other hand, autophagy function is required for the  
374 aggressive growth of tumors. The mechanism that sustains the growth of autophagy-deficient  
375 tumors is not known. In this study, we examined the cellular and molecular nature of hepatic  
376 tumors in the autophagy-deficient liver. Our findings support the following conclusions: 1) The

377 adenoma originates from the autophagy-deficient hepatocytes; 2) Hepatocyte-derived HMGB1  
378 stimulates tumor cell proliferation; 3) HMGB1 mediates the proliferative signal at least in part  
379 via RAGE in a paracrine mode; and 4) Tumors developed in the presence or absence of HMGB1  
380 have significantly different transcriptomic profiles and mitochondria function could be an  
381 important mechanistic linker to tumor promotion.

382

### 383 **1. HMGB1 may act in a paracrine model to stimulate tumor growth**

384 Hepatic tumors were histologically consistent with hepatocellular adenoma where the  
385 benign tumor cells arrange in regular plates, usually one or two cells in thickness<sup>3</sup>. Here we  
386 further showed that tumor cells were originated from the autophagy-deficient hepatocytes.

387 The composition of the tumor appears to be different from the non-tumor liver tissue. In  
388 comparison to non-tumor tissues where different hepatic cells including hepatocytes,  
389 inflammatory cells, fibrotic cells, and ductular cells coexist, the tumor tissue consists of mainly  
390 the tumor cells (HNF4 $\alpha$  positive), and some macrophages (**Figure 1-3**)(**Supplementary Table**  
391 **S6**). Other nonparenchymal cells are found only outside the tumor region. Fibrotic cells and  
392 ductular cells seem to be responsible for the formation of a fibrous capsule that demarcates the  
393 tumor from the non-tumor tissue. How the autophagy-deficient hepatocytes form the  
394 adenomatous nodule, excluding the fibrotic cells and ductular cells but retaining some  
395 macrophages, is intriguing. But macrophages could belong to those known as tumor-associated  
396 macrophages(TAM) and may enter into the tumor tissue via tumor blood vessels<sup>37</sup>.

397 HMGB1 is known to promote tumor development<sup>2,38,39</sup>. However, how HMGB1 does  
398 this, in particular for the autophagy-deficient hepatic tumors, is not clear. HMGB1 has been  
399 shown to be important for expansion of ductular cells<sup>2,38</sup>, , immune cells recruitment<sup>25</sup> and

400 activation of fibrotic cells<sup>24</sup>. All these cellular events could favor tumorigenesis. Previously, we  
401 showed that non-tumorigenic autophagy-deficient hepatocytes can release HMGB1<sup>2</sup>. Here our  
402 findings indicate that HMGB1 could be also released by the autophagy-deficient hepatic tumor  
403 cells. Thus HMGB1 may act through an autocrine or paracrine mode to promote tumor growth.

404 We found that the proliferative effect of HMGB1 could be mediated via the RAGE  
405 receptor as deletion of *Rage* also reduces tumor cell proliferation and delay tumor development  
406 (**Figure 6**). We found that RAGE receptor was not expressed by hepatocytes and stellate cells at  
407 the detectable level by immunostaining. But it could be readily detected on the surface of  
408 Kupffer's cells and HPCs<sup>2 40</sup>. Hence, the effect of HMGB1 in cell proliferation could be  
409 mediated by a paracrine manner, although the autocrine mode could be not be completely  
410 excluded (**Supplementary Figure S8**). In the paracrine mode, HMGB1 release by the  
411 tumorigenic and non-tumorigenic autophagy-deficient hepatocytes could activate macrophages  
412 or ductular cells, which then releases different cytokine factors that ultimately affect hepatocytes  
413 growth and proliferation. From this aspect, interaction between tumorigenic hepatocytes and  
414 TAM could generate an intratumoral microenvironment favoring cell growth and proliferation.  
415 However, it seems that some of the well-defined proinflammatory cytokines such as TNF $\alpha$ , IL-  
416 1 $\beta$ , and IL-6 may not play the role as the expression of these cytokines are remarkably  
417 downregulated in tumor tissues of *Atg7*<sup>-/-</sup> mice (**Supplementary Figure S4**). On the other hand,  
418 the RAGE-positive peri-tumoral ductular cells could possibly communicate with hepatocytes via  
419 cytokines such as angiogenic factors ANGPT2, PDGFb to promote protumorigenic activities,  
420 such as angiogenesis and invasiveness while inhibiting tumor infiltration into normal tissue. It is  
421 also possible that the protumorigenic factors from TAM and/or ductular cells could be mediated  
422 by extracellular vesicles, microRNAs and other cellular factors<sup>41</sup>.

423 The *Rage* deletion could not fully protect the *Atg7*<sup>-/-</sup> mice from tumor development at  
424 age of 12-month old although the tumor size still appeared significantly smaller (**Figure 6A-**  
425 **B**). This is in contrast to *Atg7*<sup>-/-</sup>/*Hmgb1*<sup>-/-</sup> mice where *Hmgb1* deletion could significantly  
426 inhibit tumor development in *Atg7*<sup>-/-</sup> mice even at the 12-month time point (**Figure 6A-B**)<sup>2</sup>. It is  
427 possible that HMGB1 affect the tumorigenesis process not only via RAGE but also through other  
428 receptors such as TLR4<sup>36</sup>. Future studies can assess the potential role of TLR4 in this process.

## 429 2. The impact of HMGB1 on tumor cells can be broad.

430 Deletion of *Hmgb1* or *Rage* led to a significant reduction in the proliferative capability of  
431 autophagy-deficient hepatocytes and tumors as demonstrated by the expression of PCNA, Ki67  
432 and Cyclin D1. Thus the pro-proliferative effect by HMGB1 confers a generally stronger  
433 capability of proliferation to autophagy-deficient hepatocytes, which would be beneficial to the  
434 growth of tumors that are derived from these cells.

435 However, RNAseq analysis indicates that there are much more unique changes in the  
436 molecular composition of the tumors caused by HMGB1. The enrichment of certain gene  
437 expression related to mitochondrial structure and function in the presence of HMGB1 and lack  
438 of such enrichment in the absence of HMGB1 are quite significant. *Hmgb1* deletion appears to  
439 suppress the mitochondrial ETC in tumors of autophagy-deficient livers. Whether and how  
440 downregulation of genes of mitochondrial ETC may suppress cell proliferation in *Atg7*<sup>-/-</sup>/*Hmgb1*<sup>-/-</sup>  
441 tumors is unclear. But it is well known that mitochondrial ETC enables many metabolic  
442 processes and is a major sources of ATP and building blocks for the proliferation of tumor cells.  
443 As a consequence of ETC dysfunction, cell proliferation could be impaired due to bioenergetics  
444 deficit. This notion is supported by the observation where pharmacological or genetic inhibition  
445 of ETC caused impaired cell proliferation of cells in vitro<sup>42,43</sup>. Interestingly, a recent study

446 suggest that ETC enables aspartate biosynthesis, a key proteogenic amino acid that is also a  
447 precursor in purine and pyrimide synthesis and is required for tumor cells growth and survival  
448 <sup>44,45</sup>. Thus tumors of *Atg7*<sup>-/-</sup>*Hmgb1*<sup>-/-</sup> liver may have defective ETC that could impair cell  
449 proliferation by limiting an intracellular aspartate level besides causing bioenergetics deficits.  
450 Many metabolic pathways including glycolysis, the TCA cycle, and  $\beta$ -oxidation produce the  
451 electron donors that fuel the ETC. Hence, impairment or downregulation of ETC could limit the  
452 regeneration of reducing equivalents, such as NAD<sup>+</sup>, which in turn suppresses glycolysis or the  
453 TCA cycle. Future studies should address these possibilities for the understanding of how  
454 HMGB1 sustains the growth of autophagy-deficient hepatic tumors. .

455 In conclusion, our findings demonstrate that hepatic adenoma originates from the  
456 autophagy-deficient hepatocytes that release HMGB1. HMGB1, in turn, can stimulate  
457 hepatocyte proliferation and hepatic tumorigenesis via RAGE in the autophagy-deficient liver.  
458 The effect of HMGB1 on tumor cells are broad as revealed by transcriptomic analysis, which  
459 offers mechanistic clues for future studies.

## 460 **Materials and Methods**

461 **Animal experiments:** *Atg7*<sup>F/F</sup>, *Atg7*<sup>-/-</sup>, *Atg7*<sup>-/-</sup>*Hmgb1*<sup>-/-</sup>, *Atg7*<sup>-/-</sup>*Rage*<sup>-/-</sup>, *Hmgb1*<sup>-/-</sup>, and  
462 *Rage*<sup>-/-</sup> mice were used in this study. *Atg7*<sup>F/F</sup> was obtained from Dr. Komatsu Masaaki (Nigata  
463 University, Japan). These mice were backcrossed with C57BL/6J for another 10 generations as  
464 described previously<sup>2,20</sup>. Albumin-Cre mice were obtained from the Jackson Laboratory (Bar  
465 Harbor, ME). *Hmgb1*<sup>F/F</sup> and *Rage* mice were as described<sup>2</sup>. Hepatic *Atg7*<sup>-/-</sup> mice were further  
466 crossed with *Hmgb1*<sup>F/F</sup> or *Rage* to generate *Atg7*<sup>-/-</sup>*Hmgb1*<sup>-/-</sup> or *Atg7*<sup>-/-</sup>*Rage*<sup>-/-</sup> mice as  
467 previously described<sup>2</sup>. Both male and female mice were used in the study. All animals received

468 humane care, and all procedures were approved by the Institutional Animal Care and use  
469 Committee(IACUC) of the Indiana University.

470 **Tumor sample collection:** The whole liver was carefully removed from the euthanized animals,  
471 washed, and placed in cold PBS. The number of tumor nodules on the liver surface was counted  
472 for all the liver lobes. Tumor nodules with >2mm in diameter were carefully removed and  
473 examined as tumor tissue. Tissue without visible tumor nodules were sampled as non-tumor  
474 tissues. All tissues were collected in separate tubes and stored at -80°C for future studies. Liver  
475 tissues containing the tumor nodule and the surrounding non-tumor tissue were excised and fixed  
476 in 10% neutral formalin or buffered with 4% PFA overnight for paraffin-embedding or for OCT  
477 embedding. The tissue section was prepared from the frozen or paraffin blocks for general  
478 histology, immunostaining, and immunohistochemistry analysis.

479 **General histological and immunological analysis:** General histology was examined on  
480 paraffin-embedded sections stained with hematoxylin and eosin (H-E). Liver fibrosis was  
481 determined by Sirius Red staining or Masson's Trichome staining. For immunostaining, liver  
482 sections were subjected to heat-induced antigen retrieval using citrate buffer (pH 6.0) followed  
483 by permeabilization and blockage with 10% goat or donkey serum in PBS containing 0.5%  
484 triton-X for 1 hour. Sections were incubated overnight at 4°C with primary antibody diluted in  
485 PBS. Primary antibodies used in this study are listed in **Supplementary Table S8**. Sections were  
486 then incubated with Alexa-488 or Cy3-conjugated secondary antibodies. Images were obtained  
487 using Nikon Eclipse TE 200 epi-immunofluorescence microscope. Hoechst 33342 was used for  
488 nucleus staining. Images were analyzed using NIS-element AR3.2 software.

489 Immunoblot analysis was performed as described previously<sup>2,20</sup> using primary  
490 antibodies and respective secondary antibodies conjugated with horseradish peroxidase as listed

491 in **Supplementary Table S8**. The respective protein bands were visualized using the  
492 immunobilon chemiluminescence system (Millipore, MA). The densitometry analysis of  
493 immunoblotting images was performed using Quantity One Software (Bio-rad). Densitometry  
494 values were normalized to the loading control (GAPDH) and then converted to units relative to  
495 the untreated control.

496

497 **Total RNA isolation, reverse transcription, and quantitative real-time PCR analysis:** Total  
498 RNA was isolated from liver tissues using a GeneTET RNA Purification Kit (Thermo Fisher  
499 Scientific) according to the manufacturer's protocol. cDNA was synthesized using an M-MLV  
500 Reverse Transcriptase Enzyme System (Life Technologies, Thermo Fisher Scientific) and  
501 OligodT primers. The resulting cDNA products were subjected to qPCR reaction using SYBR  
502 Green Master Mixes. qPCR was performed on a Quanta studio 3 PCR machine (Life  
503 Technologies–Applied Biosystems, Thermo Fisher Scientific). The threshold crossing value(Ct)  
504 was determined for each transcript and then normalized to that of the internal gene transcript(  $\beta$ -  
505 actin). Fold change values were then calculated using the  $2^{-\Delta\Delta Ct}$  method. Genes-specific primers  
506 were designed using Integrated DNA Technologies (IDT) PrimerQuest software. Sequences of  
507 the forward and reverse primers are listed in **Supplementary Table S7**.

508

509 **RNA-sequencing and bioinformatics analysis:** RNA was isolated as described above. RNAseq  
510 was performed by The Center for Medical Genomics facility at Indiana University. The integrity  
511 of RNA was determined using an Agilent Bioanalyzer 2100 (Agilent Technologies;Santa Clara,  
512 CA). Extracted RNA was processed for rRNA removal using the Epicenter rRNA depletion kit  
513 according to the manufacturer's instructions. rRNA-depleted RNA was subsequently used to

514 generate paired-end sequencing libraries using the Illumina RNA TruSeq Library Kit according  
515 to the manufacturer's instruction. RNAseq was performed using Illumina HiSeq 4000 (Illumina,  
516 San Diego, CA). For bioinformatics analysis, we first used FastQC  
517 (<http://www.bioinformatics.babraham.ac.uk/projects/fastqc>) to examine RNA-seq quality. Then  
518 all high-quality sequences were mapped to the mouse genome (mm10, UCSC Genome Browser,  
519 <https://genome.ucsc.edu/>) with the STAR, an RNA-seq aligner<sup>46</sup>. The featureCounts was adopted  
520 to assign uniquely mapped reads to genes according to UCSC refGene (mm10)<sup>47</sup>. Those low-  
521 expressed genes were not further analyzed if their raw counts were less than 10 in more than  
522 three samples for each pairwise comparison. The gene expression was normalized cross all  
523 samples based on trimmed mean of M (TMM) values implemented in EdgeR<sup>48</sup>, followed by  
524 differential expression analysis given comparisons between non-tumor and tumor tissues, in  
525 either single knockout or double knockout mice. Genes with p values less than 0.01 after  
526 multiple-test false discovery rate (FDR) correction were determined as differentially expressed  
527 genes (DEGs) for specific comparisons. The gene ontology (GO) and KEGG pathways  
528 significantly enriched in DEGs were identified by DAVID functional annotation analysis tools<sup>49</sup>.  
529

530 **Statistical Analysis:** Statistical analyses were performed with Sigma Plot. All experimental data  
531 were expressed as Mean±SE. Student t-test was performed to compare values from two groups.  
532 To compare values obtained from three or more groups, one way ANOVA analysis with the  
533 appropriate post-hoc analysis was used. Statistical significance was taken at the level of P< 0.05.

#### 534 **Acknowledgment**

535 The CK19 monoclonal antibodies were obtained from the Developmental Studies  
536 Hybridoma Bank, created by the National Institute of Child Health and Human Development



537 (NICHD), NIH, and maintained at the Department of Biology of The University of Iowa (Iowa  
538 City, Iowa, USA). This work was in part supported by NIH/NIDDK grants R01 DK116605  
539 (XMY).

540

541 **Conflict of Interest:** The authors have declared that no conflict of interest exists.

542

#### 543 **Authors contributions**

544 BK designed project and directed study, analyzed data and wrote the manuscript. BK, XC  
545 conducted experiments, acquired data, and analyzed data. HH, GL, JW helped in gene expression  
546 analysis. ZD gave critical discussions. XMY designed research experiments, analyzed data, and  
547 edited the manuscript.

548

549 **REFERENCES**

- 550 1 Ni, H. M. *et al.* Nrf2 promotes the development of fibrosis and tumorigenesis in mice with  
551 defective hepatic autophagy. *J Hepatol* **61**, 617-625, doi:10.1016/j.jhep.2014.04.043 (2014).
- 552 2 Khambu, B. *et al.* HMGB1 promotes ductular reaction and tumorigenesis in autophagy-deficient  
553 livers. *J Clin Invest* **128**, 2419-2435, doi:10.1172/jci91814 (2018).
- 554 3 Inami, Y. *et al.* Persistent activation of Nrf2 through p62 in hepatocellular carcinoma cells. *J Cell*  
555 *Biol* **193**, 275-284, doi:10.1083/jcb.201102031 (2011).
- 556 4 Takamura, A. *et al.* Autophagy-deficient mice develop multiple liver tumors. *Genes Dev* **25**, 795-  
557 800, doi:10.1101/gad.2016211 (2011).
- 558 5 Hu, T. H. *et al.* Expression and prognostic role of tumor suppressor gene PTEN/MMAC1/TEP1 in  
559 hepatocellular carcinoma. *Cancer* **97**, 1929-1940, doi:10.1002/cncr.11266 (2003).
- 560 6 Ho, D. W. H. *et al.* TSC1/2 mutations define a molecular subset of HCC with aggressive behaviour  
561 and treatment implication. *Gut* **66**, 1496-1506, doi:10.1136/gutjnl-2016-312734 (2017).
- 562 7 Mathew, R. *et al.* Autophagy suppresses tumorigenesis through elimination of p62. *Cell* **137**,  
563 1062-1075, doi:10.1016/j.cell.2009.03.048 (2009).
- 564 8 Tian, Y. *et al.* Autophagy inhibits oxidative stress and tumor suppressors to exert its dual effect  
565 on hepatocarcinogenesis. *Cell Death Differ* **22**, 1025-1034, doi:10.1038/cdd.2014.201 (2015).
- 566 9 Komatsu, M. *et al.* The selective autophagy substrate p62 activates the stress responsive  
567 transcription factor Nrf2 through inactivation of Keap1. *Nat Cell Biol* **12**, 213-223,  
568 doi:10.1038/ncb2021 (2010).
- 569 10 Onate, S. A. *et al.* The DNA-bending protein HMG-1 enhances progesterone receptor binding to  
570 its target DNA sequences. *Molecular and cellular biology* **14**, 3376-3391,  
571 doi:10.1128/mcb.14.5.3376 (1994).
- 572 11 Tummala, K. S. *et al.* Hepatocellular Carcinomas Originate Predominantly from Hepatocytes and  
573 Benign Lesions from Hepatic Progenitor Cells. *Cell Rep* **19**, 584-600,  
574 doi:10.1016/j.celrep.2017.03.059 (2017).
- 575 12 Lowes, K. N., Brennan, B. A., Yeoh, G. C. & Olynyk, J. K. Oval cell numbers in human chronic liver  
576 diseases are directly related to disease severity. *The American journal of pathology* **154**, 537-  
577 541, doi:10.1016/s0002-9440(10)65299-6 (1999).
- 578 13 Holczbauer, A. *et al.* Modeling pathogenesis of primary liver cancer in lineage-specific mouse cell  
579 types. *Gastroenterology* **145**, 221-231, doi:10.1053/j.gastro.2013.03.013 (2013).
- 580 14 Mu, X. *et al.* Hepatocellular carcinoma originates from hepatocytes and not from the  
581 progenitor/biliary compartment. *J Clin Invest* **125**, 3891-3903, doi:10.1172/jci77995 (2015).
- 582 15 Nio, K., Yamashita, T. & Kaneko, S. The evolving concept of liver cancer stem cells. *Mol Cancer*  
583 **16**, 4, doi:10.1186/s12943-016-0572-9 (2017).
- 584 16 Yamashita, T. & Wang, X. W. Cancer stem cells in the development of liver cancer. *J Clin Invest*  
585 **123**, 1911-1918, doi:10.1172/jci66024 (2013).
- 586 17 Liu, K. *et al.* Mitophagy Controls the Activities of Tumor Suppressor p53 to Regulate Hepatic  
587 Cancer Stem Cells. *Mol Cell* **68**, 281-292.e285, doi:10.1016/j.molcel.2017.09.022 (2017).
- 588 18 Lee, S., Zhou, P., Gupta, A. & Shin, S. Reactive Ductules Are Associated With Angiogenesis and  
589 Tumor Cell Proliferation in Pediatric Liver Cancer. *Hepatol Commun* **2**, 1199-1212,  
590 doi:10.1002/hep4.1204 (2018).
- 591 19 El-Serag, H. B. Hepatocellular carcinoma. *N Engl J Med* **365**, 1118-1127,  
592 doi:10.1056/NEJMra1001683 (2011).

- 593 20 Khambu, B. *et al.* Hepatic Autophagy Deficiency Compromises Farnesoid X Receptor  
594 Functionality and Causes Cholestatic Injury. *Hepatology* **69**, 2196-2213, doi:10.1002/hep.30407  
595 (2019).
- 596 21 Condeelis, J. & Pollard, J. W. Macrophages: obligate partners for tumor cell migration, invasion,  
597 and metastasis. *Cell* **124**, 263-266, doi:10.1016/j.cell.2006.01.007 (2006).
- 598 22 Nakagawa, H. *et al.* ER stress cooperates with hypernutrition to trigger TNF-dependent  
599 spontaneous HCC development. *Cancer Cell* **26**, 331-343, doi:10.1016/j.ccr.2014.07.001 (2014).
- 600 23 Komatsu, M. *et al.* Impairment of starvation-induced and constitutive autophagy in Atg7-  
601 deficient mice. *J Cell Biol* **169**, 425-434, doi:10.1083/jcb.200412022 (2005).
- 602 24 Ge, X. *et al.* High Mobility Group Box-1 Drives Fibrosis Progression Signaling via the Receptor for  
603 Advanced Glycation End Products in Mice. *Hepatology* **68**, 2380-2404, doi:10.1002/hep.30093  
604 (2018).
- 605 25 Schiraldi, M. *et al.* HMGB1 promotes recruitment of inflammatory cells to damaged tissues by  
606 forming a complex with CXCL12 and signaling via CXCR4. *The Journal of experimental medicine*  
607 **209**, 551-563, doi:10.1084/jem.20111739 (2012).
- 608 26 Yaser, A. M. *et al.* The Role of receptor for Advanced Glycation End Products (RAGE) in the  
609 proliferation of hepatocellular carcinoma. *Int J Mol Sci* **13**, 5982-5997,  
610 doi:10.3390/ijms13055982 (2012).
- 611 27 Faes, S. & Dormond, O. PI3K and AKT: Unfaithful Partners in Cancer. *Int J Mol Sci* **16**, 21138-  
612 21152, doi:10.3390/ijms160921138 (2015).
- 613 28 Martini, M., De Santis, M. C., Braccini, L., Gulluni, F. & Hirsch, E. PI3K/AKT signaling pathway and  
614 cancer: an updated review. *Ann Med* **46**, 372-383, doi:10.3109/07853890.2014.912836 (2014).
- 615 29 Win, S. *et al.* New insights into the role and mechanism of c-Jun-N-terminal kinase signaling in  
616 the pathobiology of liver diseases. *Hepatology* **67**, 2013-2024, doi:10.1002/hep.29689 (2018).
- 617 30 Ni, H. M. *et al.* Dual Roles of Mammalian Target of Rapamycin in Regulating Liver Injury and  
618 Tumorigenesis in Autophagy-Defective Mouse Liver. *Hepatology*, doi:10.1002/hep.30770 (2019).
- 619 31 Ito, Y. *et al.* Activation of mitogen-activated protein kinases/extracellular signal-regulated  
620 kinases in human hepatocellular carcinoma. *Hepatology* **27**, 951-958,  
621 doi:10.1002/hep.510270409 (1998).
- 622 32 Lee, T. K. *et al.* CD24(+) liver tumor-initiating cells drive self-renewal and tumor initiation  
623 through STAT3-mediated NANOG regulation. *Cell Stem Cell* **9**, 50-63,  
624 doi:10.1016/j.stem.2011.06.005 (2011).
- 625 33 He, G. & Karin, M. NF-kappaB and STAT3 - key players in liver inflammation and cancer. *Cell Res*  
626 **21**, 159-168, doi:10.1038/cr.2010.183 (2011).
- 627 34 Feng, G. S. Conflicting roles of molecules in hepatocarcinogenesis: paradigm or paradox. *Cancer*  
628 *Cell* **21**, 150-154, doi:10.1016/j.ccr.2012.01.001 (2012).
- 629 35 Bai, L., Ni, H. M., Chen, X., DiFrancesca, D. & Yin, X. M. Deletion of Bid impedes cell proliferation  
630 and hepatic carcinogenesis. *The American journal of pathology* **166**, 1523-1532,  
631 doi:10.1016/s0002-9440(10)62368-1 (2005).
- 632 36 Gaskell, H., Ge, X. & Nieto, N. High-Mobility Group Box-1 and Liver Disease. *Hepatol Commun* **2**,  
633 1005-1020, doi:10.1002/hep4.1223 (2018).
- 634 37 McAllister, S. S. & Weinberg, R. A. The tumour-induced systemic environment as a critical  
635 regulator of cancer progression and metastasis. *Nat Cell Biol* **16**, 717-727, doi:10.1038/ncb3015  
636 (2014).
- 637 38 Hernandez, C. *et al.* HMGB1 links chronic liver injury to progenitor responses and  
638 hepatocarcinogenesis. *J Clin Invest* **128**, 2436-2451, doi:10.1172/jci91786 (2018).

- 639 39 Chen, R. *et al.* High mobility group protein B1 controls liver cancer initiation through yes-  
640 associated protein -dependent aerobic glycolysis. *Hepatology* **67**, 1823-1841,  
641 doi:10.1002/hep.29663 (2018).
- 642 40 Zeng, S. *et al.* Blockade of receptor for advanced glycation end product (RAGE) attenuates  
643 ischemia and reperfusion injury to the liver in mice. *Hepatology* **39**, 422-432,  
644 doi:10.1002/hep.20045 (2004).
- 645 41 Sun, Z. *et al.* Effect of exosomal miRNA on cancer biology and clinical applications. *Mol Cancer*  
646 **17**, 147, doi:10.1186/s12943-018-0897-7 (2018).
- 647 42 Wheaton, W. W. *et al.* Metformin inhibits mitochondrial complex I of cancer cells to reduce  
648 tumorigenesis. *Elife* **3**, e02242, doi:10.7554/eLife.02242 (2014).
- 649 43 Han, Y. H., Kim, S. H., Kim, S. Z. & Park, W. H. Antimycin A as a mitochondrial electron transport  
650 inhibitor prevents the growth of human lung cancer A549 cells. *Oncol Rep* **20**, 689-693 (2008).
- 651 44 Lane, A. N. & Fan, T. W. Regulation of mammalian nucleotide metabolism and biosynthesis.  
652 *Nucleic Acids Res* **43**, 2466-2485, doi:10.1093/nar/gkv047 (2015).
- 653 45 Birsoy, K. *et al.* An Essential Role of the Mitochondrial Electron Transport Chain in Cell  
654 Proliferation Is to Enable Aspartate Synthesis. *Cell* **162**, 540-551, doi:10.1016/j.cell.2015.07.016  
655 (2015).
- 656 46 Dobin, A. *et al.* STAR: ultrafast universal RNA-seq aligner. *Bioinformatics* **29**, 15-21,  
657 doi:10.1093/bioinformatics/bts635 (2013).
- 658 47 Liao, Y., Smyth, G. K. & Shi, W. featureCounts: an efficient general purpose program for  
659 assigning sequence reads to genomic features. *Bioinformatics* **30**, 923-930,  
660 doi:10.1093/bioinformatics/btt656 (2014).
- 661 48 Robinson, M. D., McCarthy, D. J. & Smyth, G. K. edgeR: a Bioconductor package for differential  
662 expression analysis of digital gene expression data. *Bioinformatics* **26**, 139-140,  
663 doi:10.1093/bioinformatics/btp616 (2010).
- 664 49 Huang, D. W. *et al.* The DAVID Gene Functional Classification Tool: a novel biological module-  
665 centric algorithm to functionally analyze large gene lists. *Genome Biol* **8**, R183, doi:10.1186/gb-  
666 2007-8-9-r183 (2007).

667



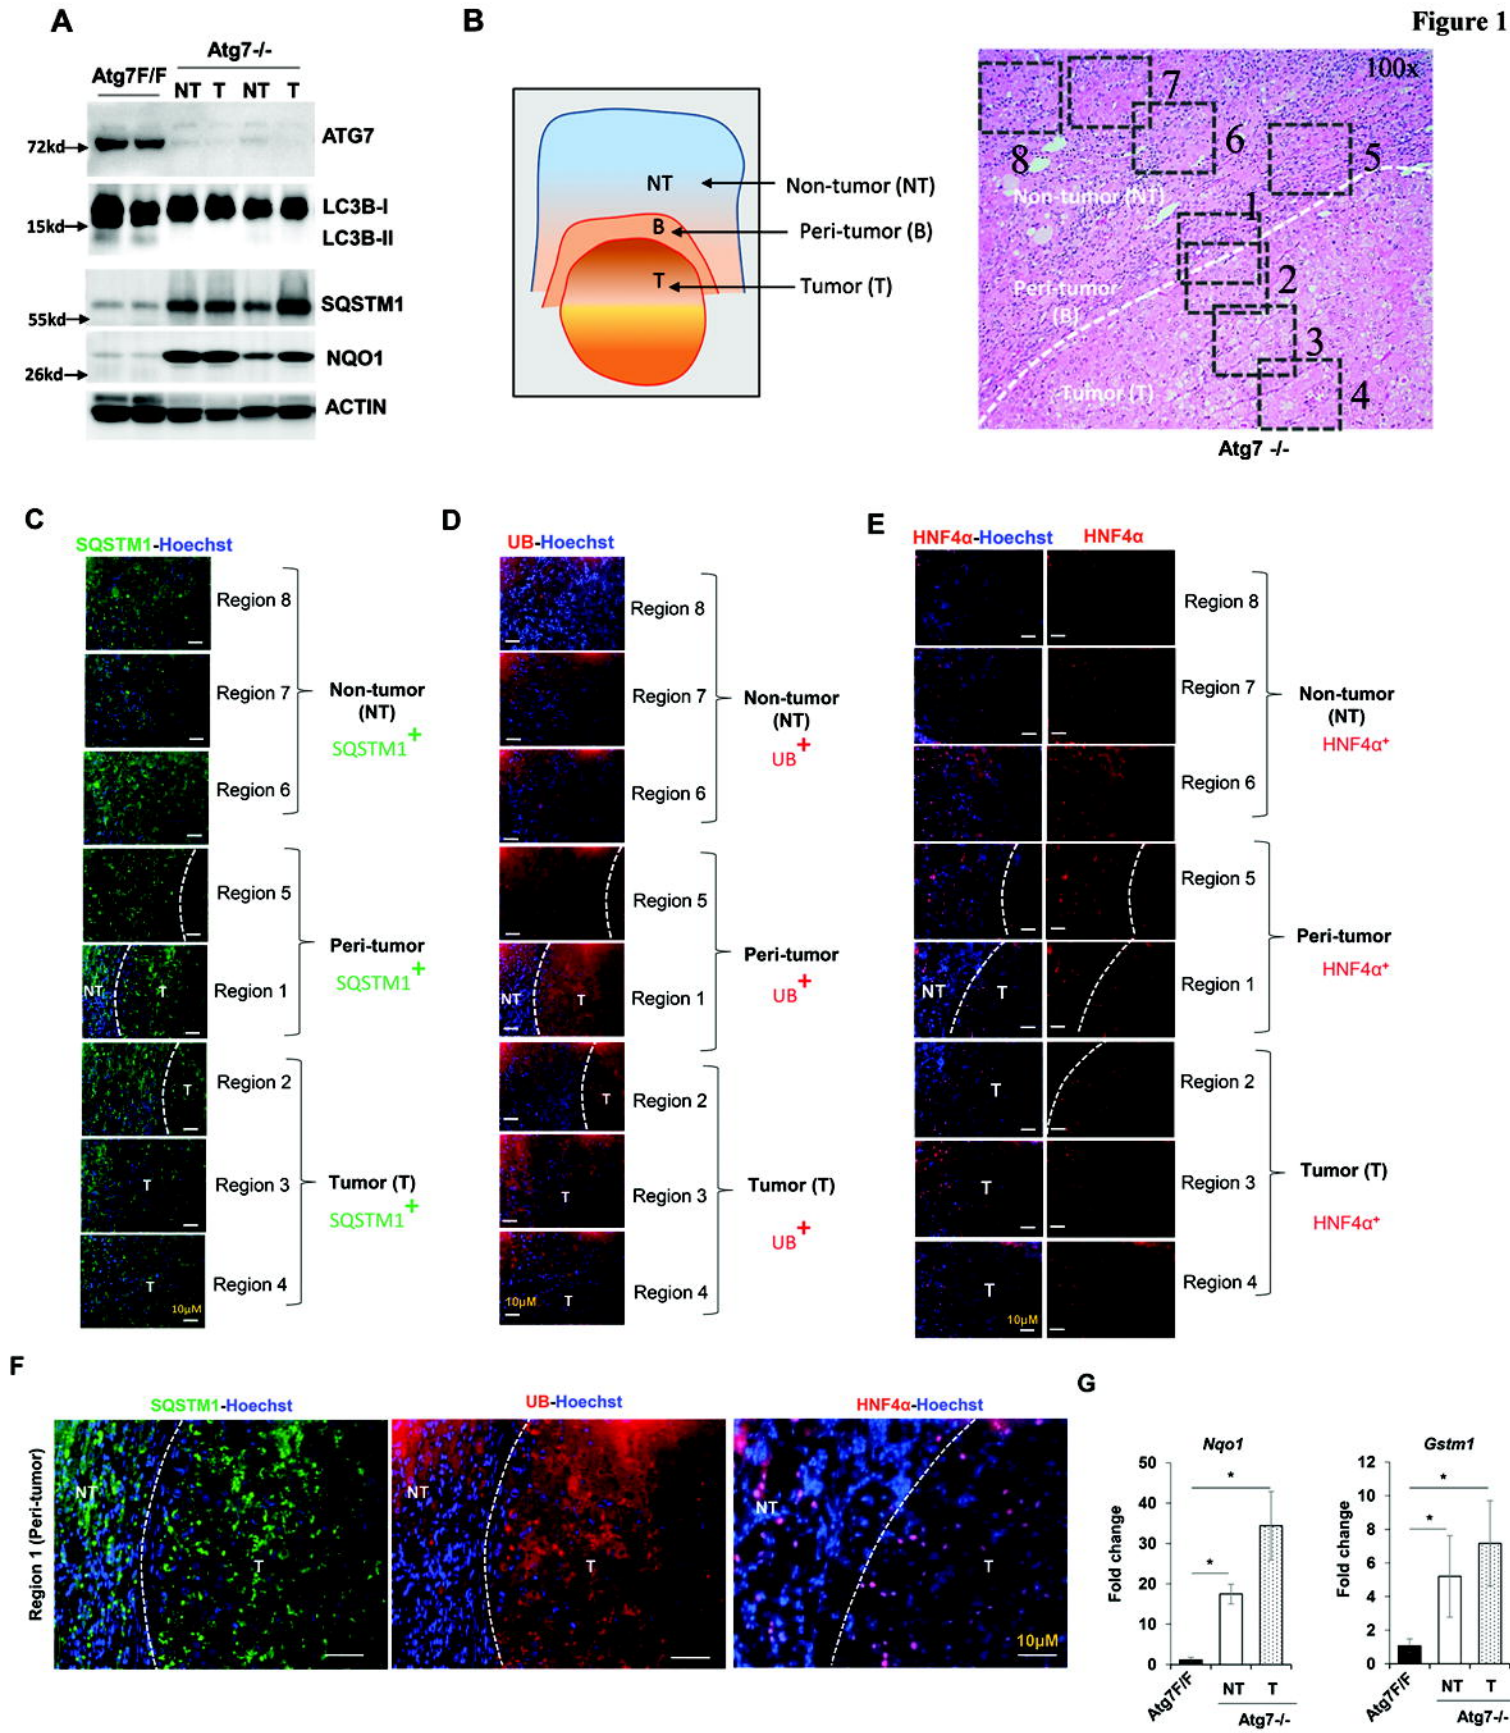

Figure 2

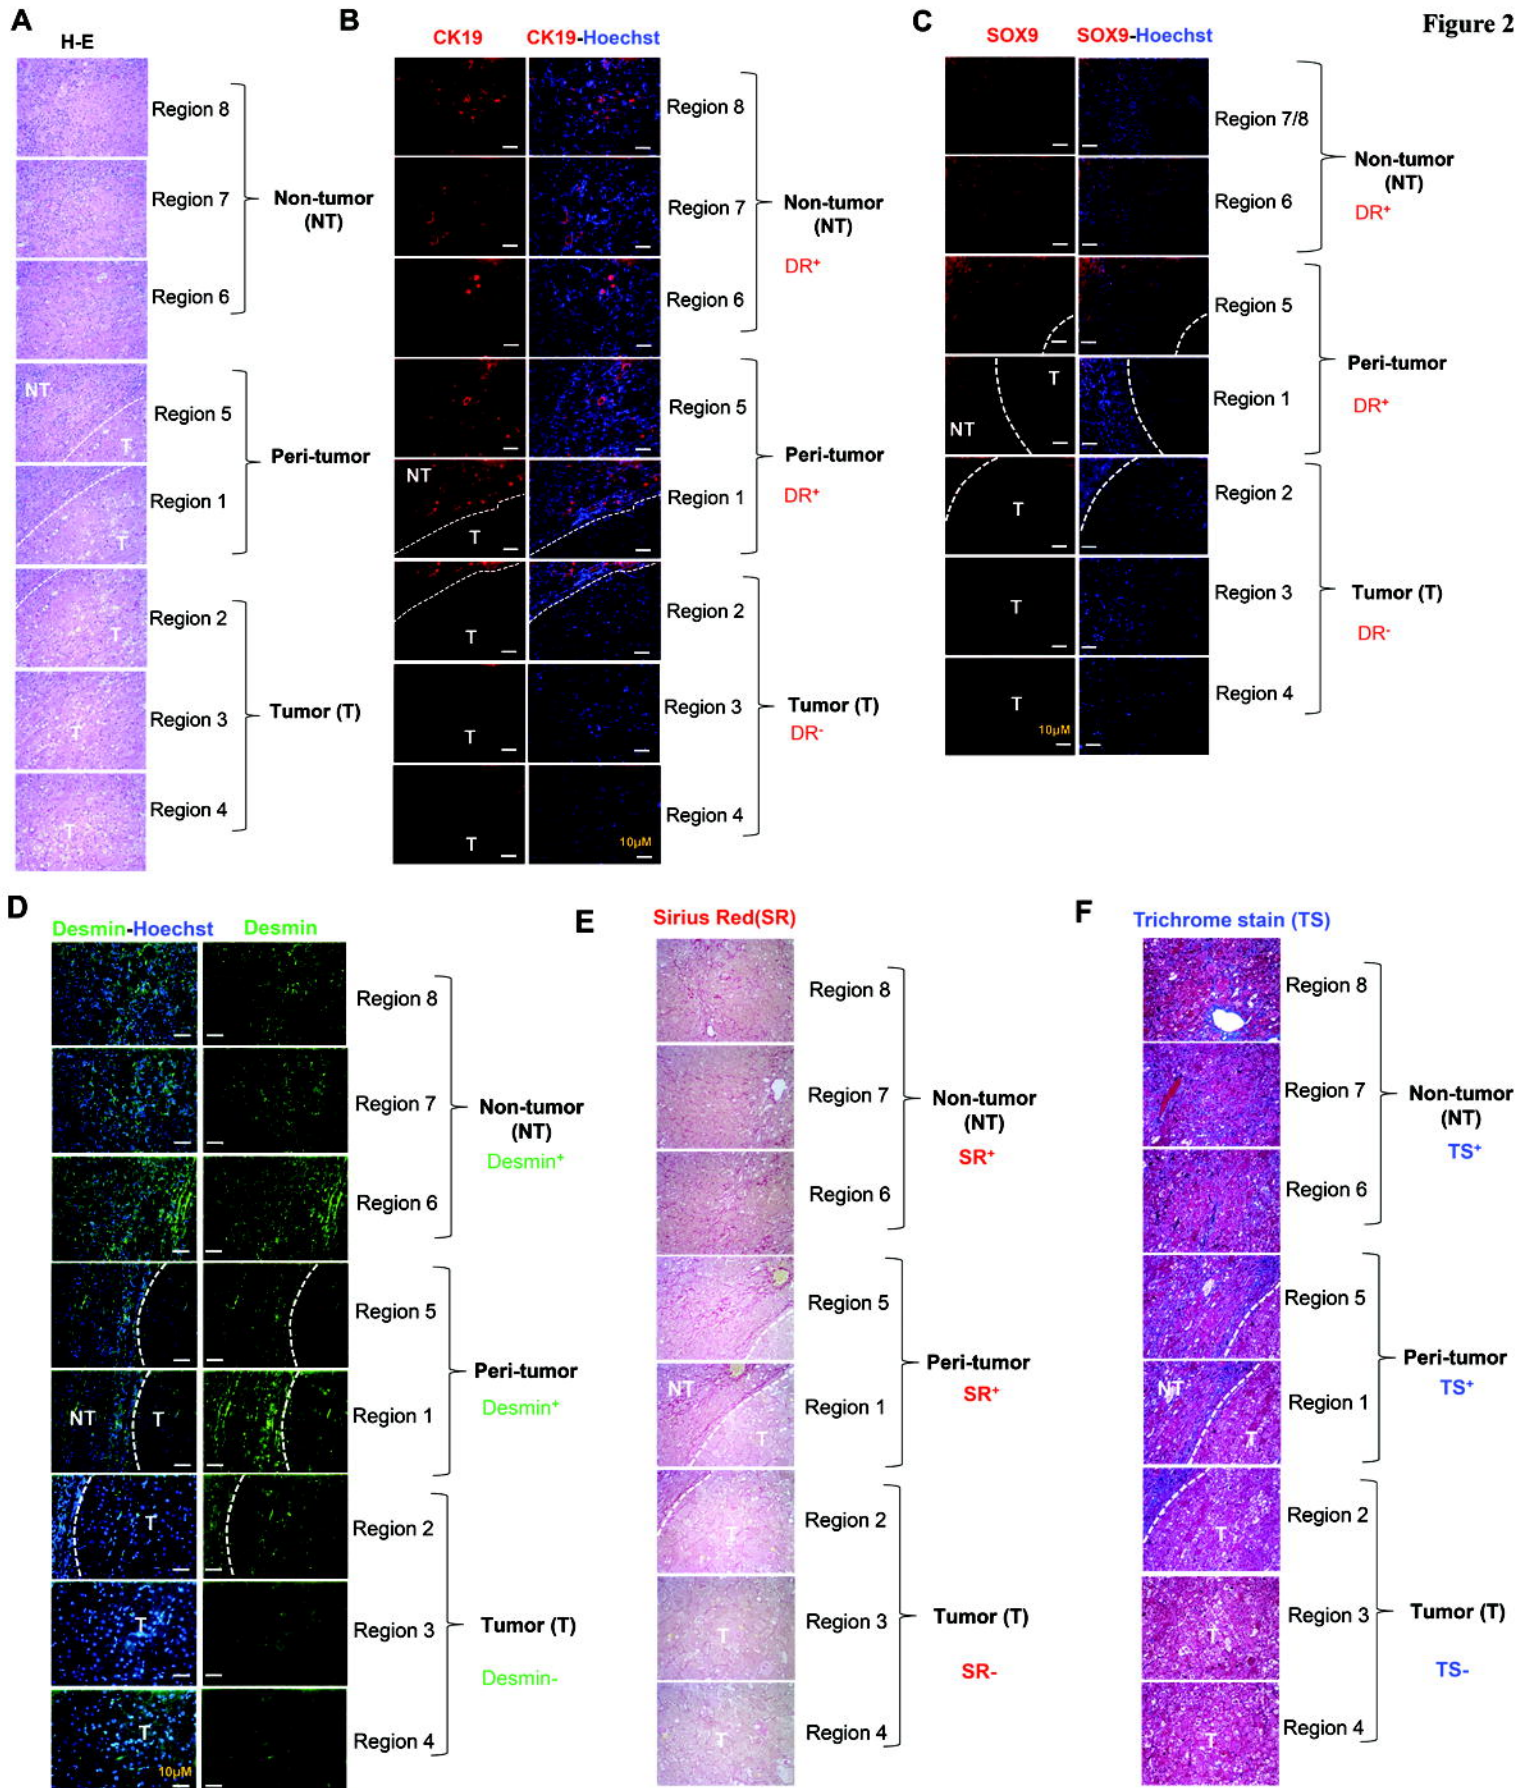

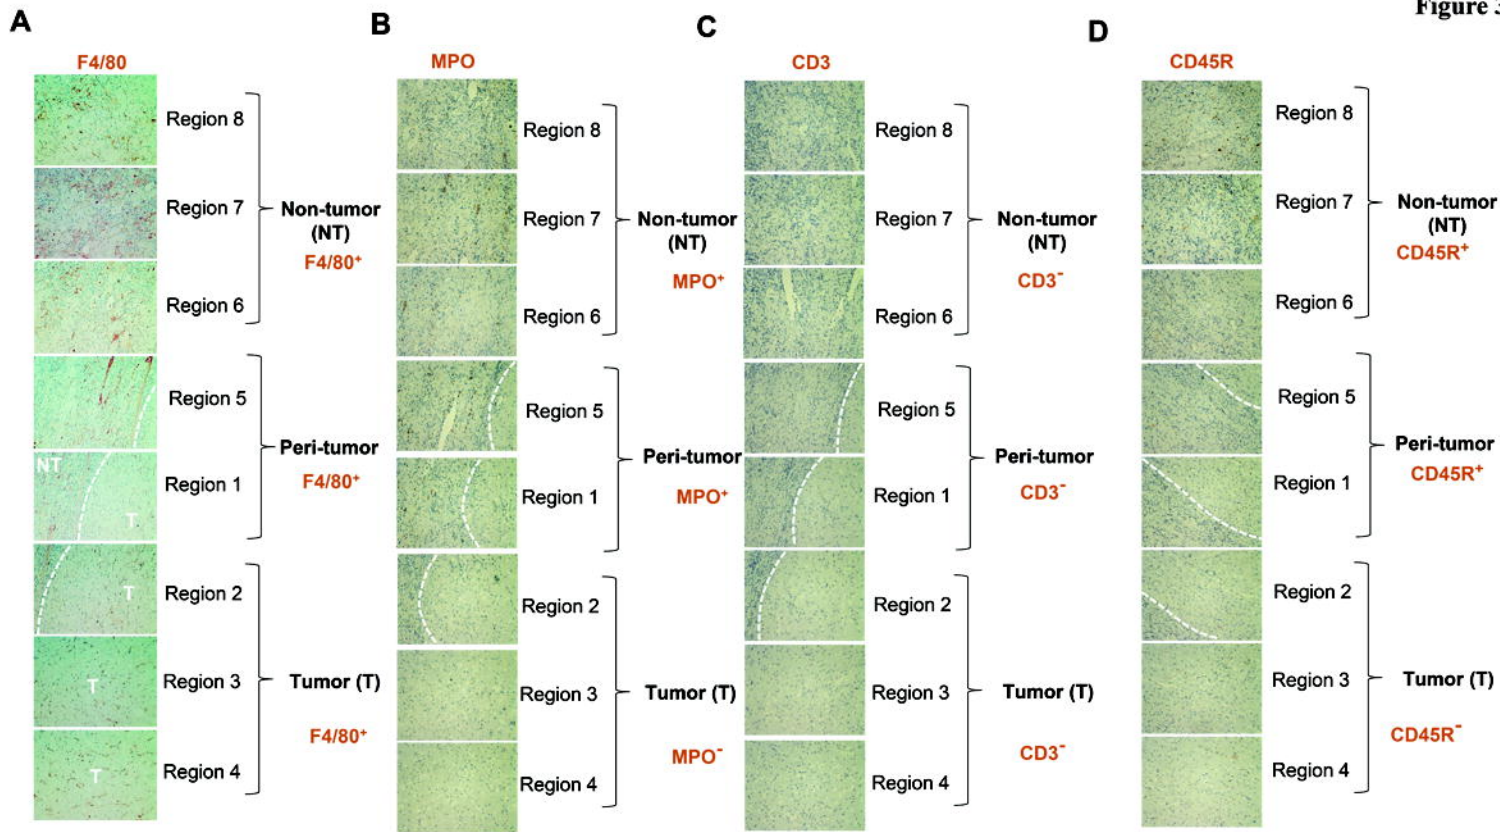**E**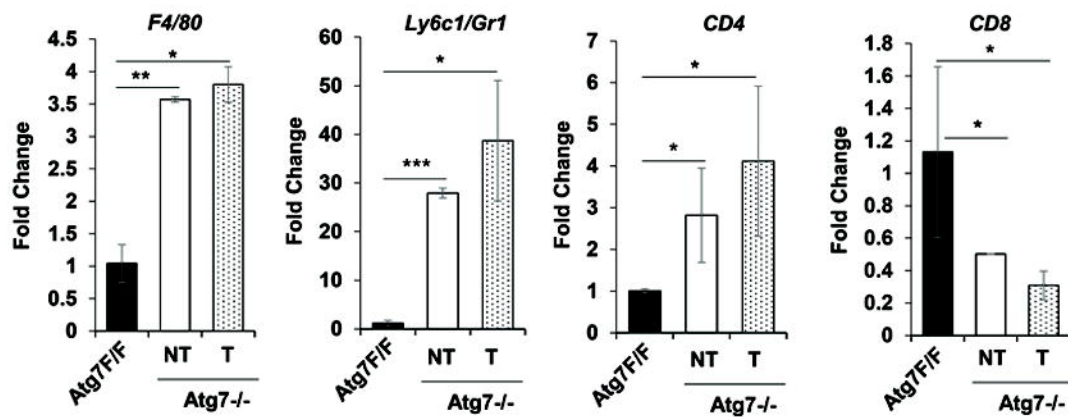



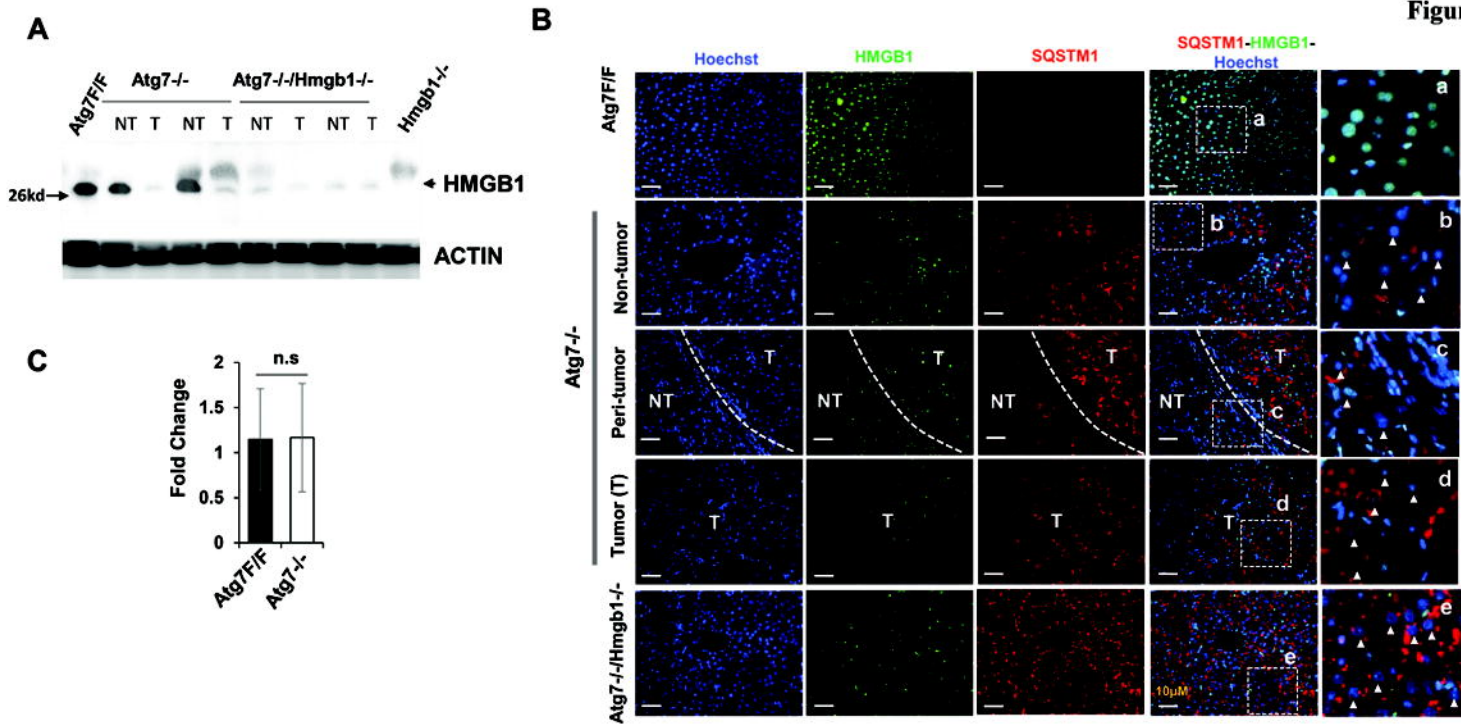

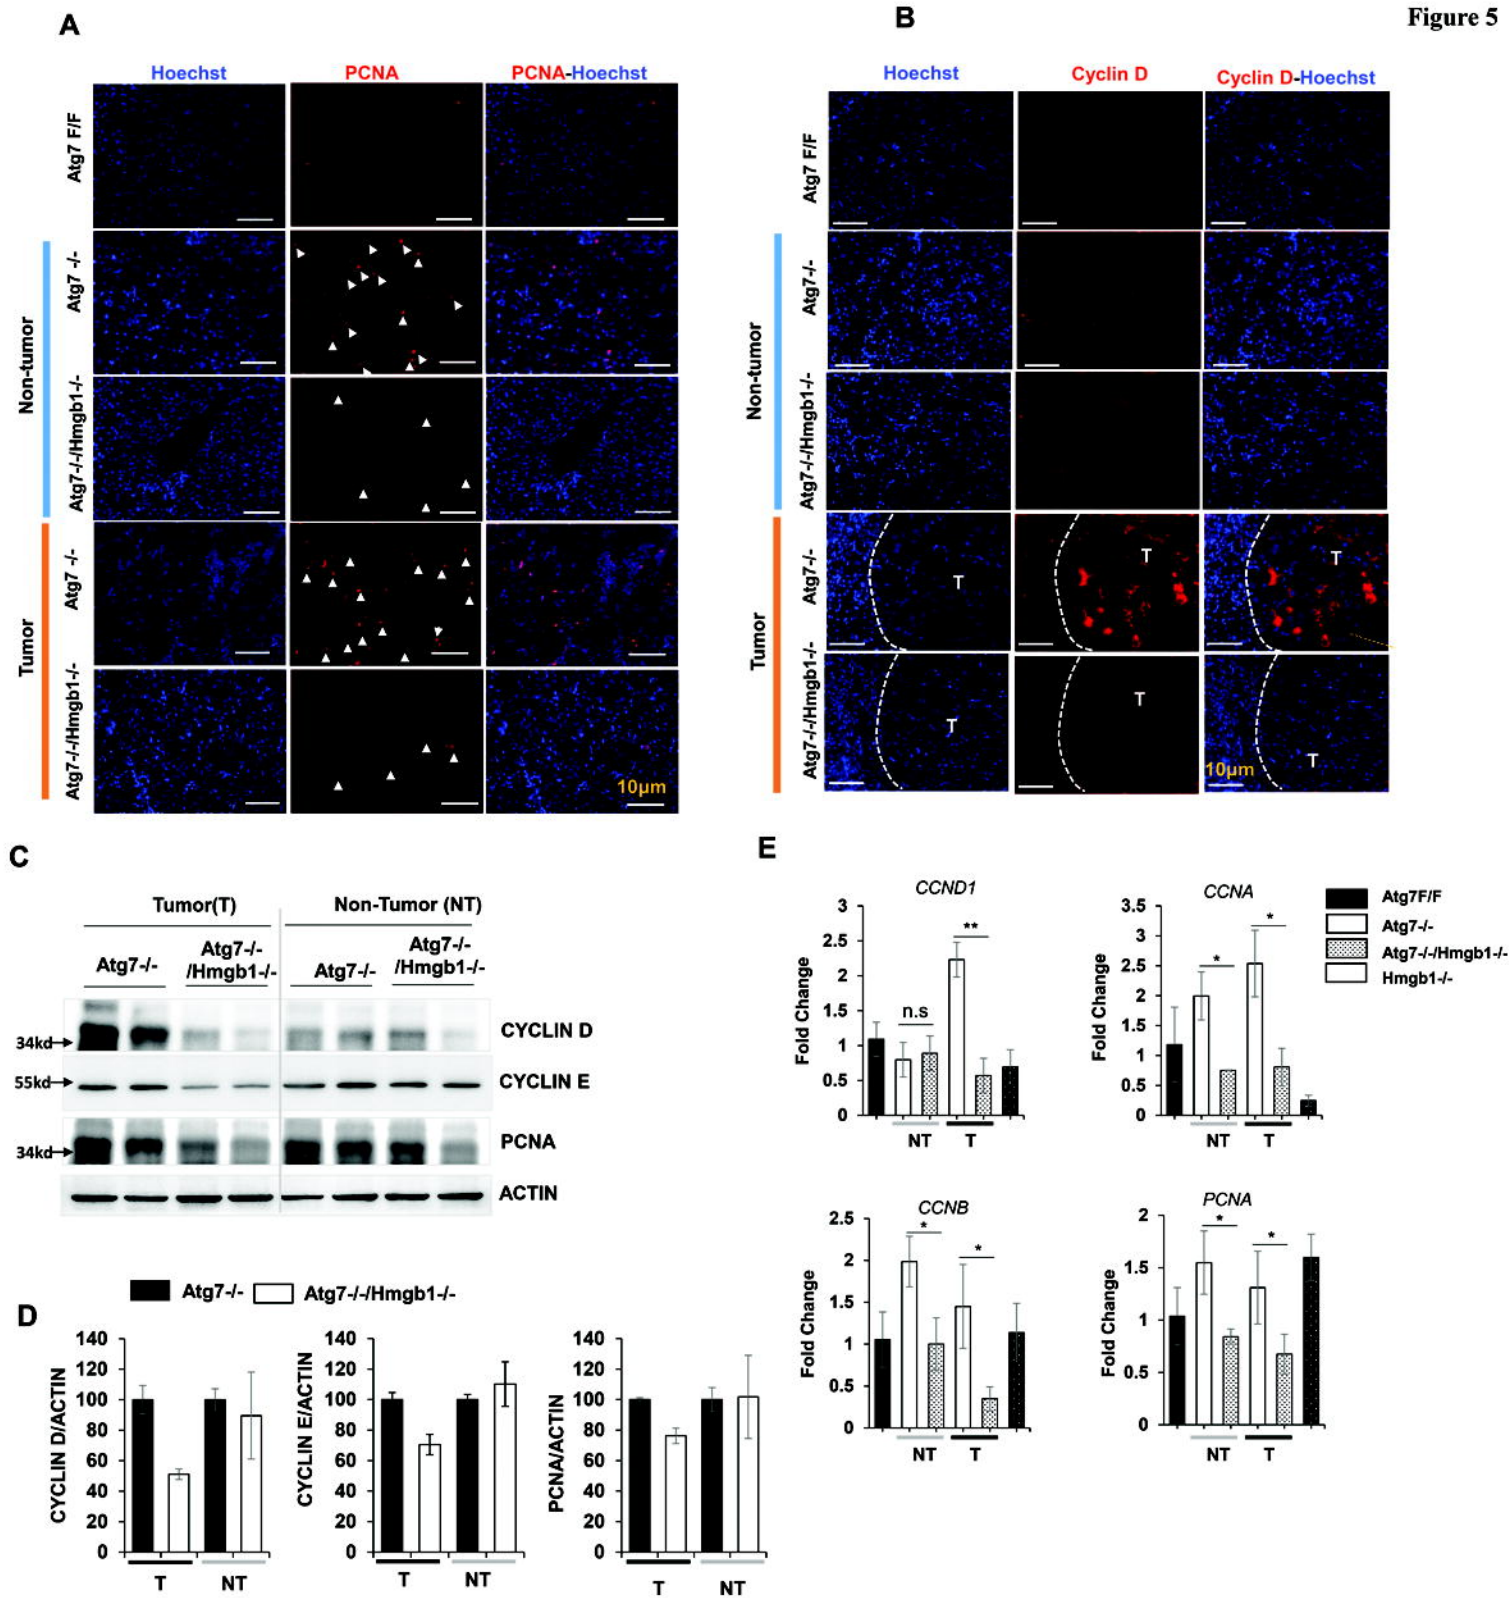

A

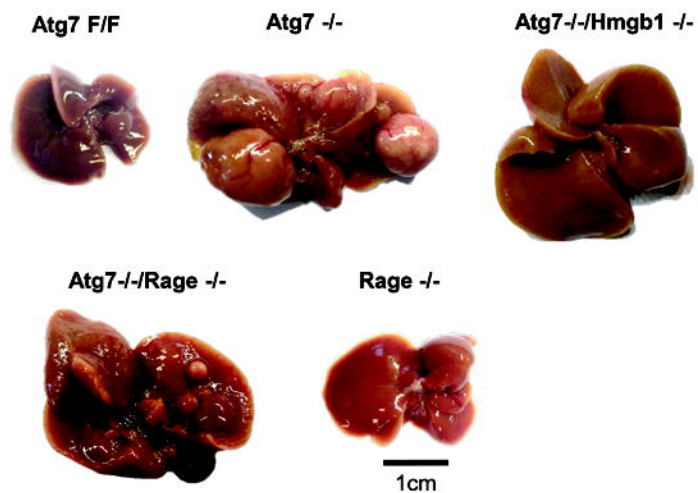

B

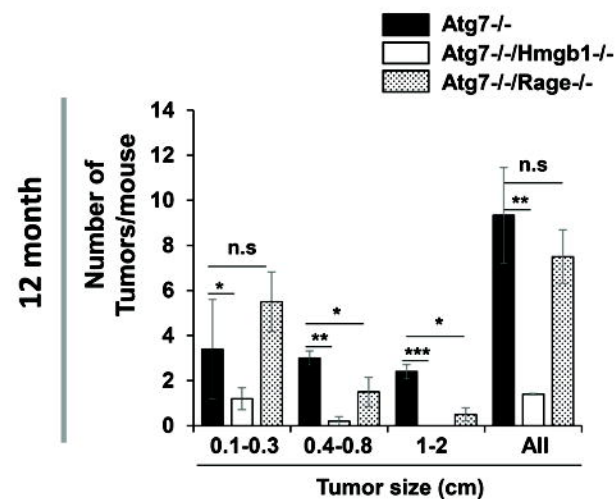

C

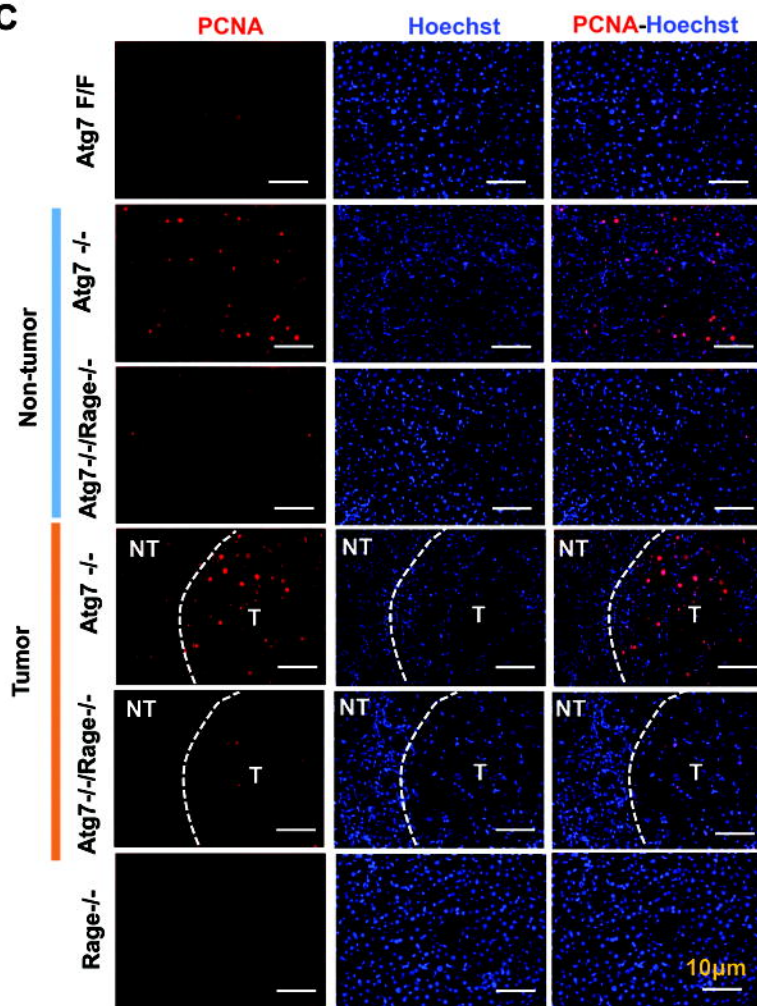

D

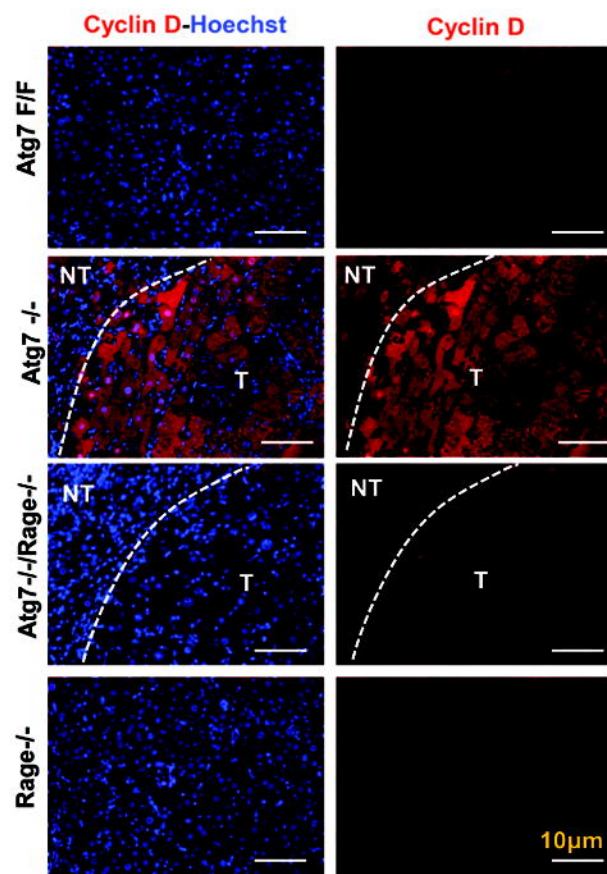

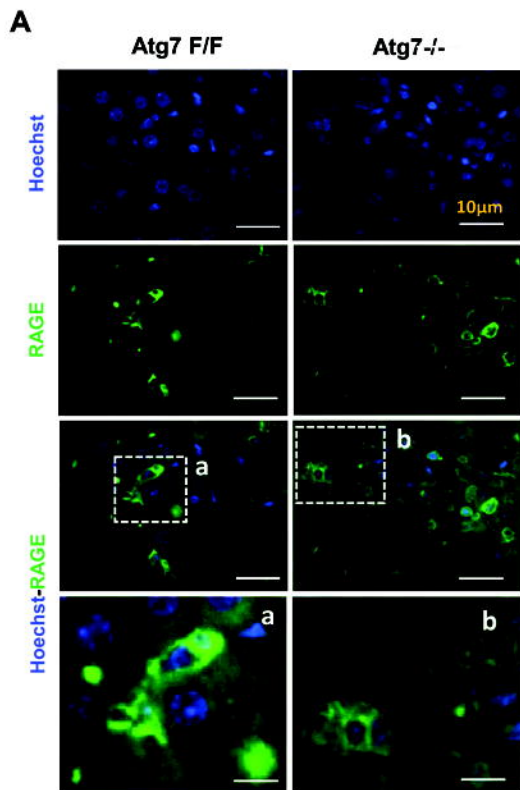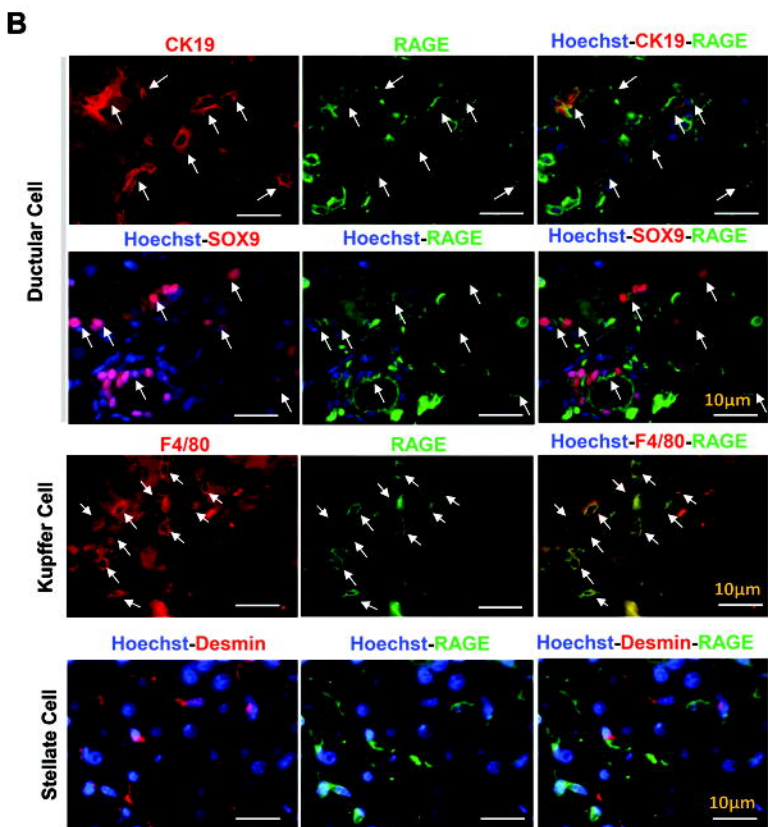

A

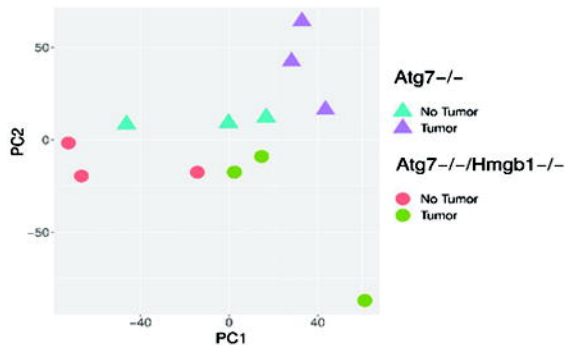

B

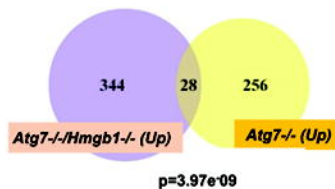

C

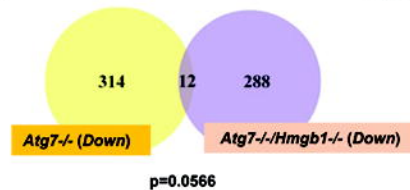

D

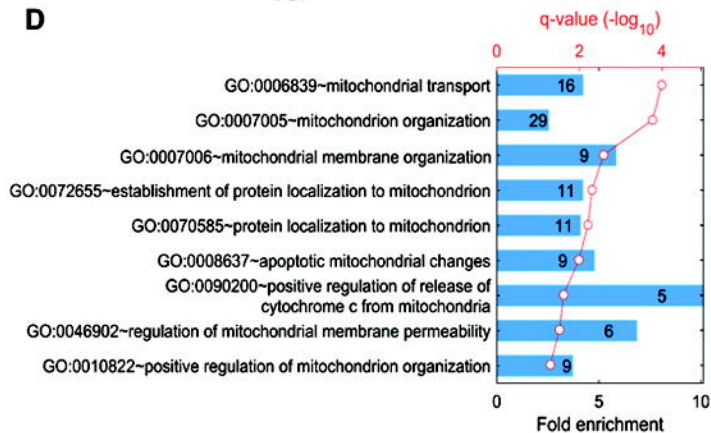

E

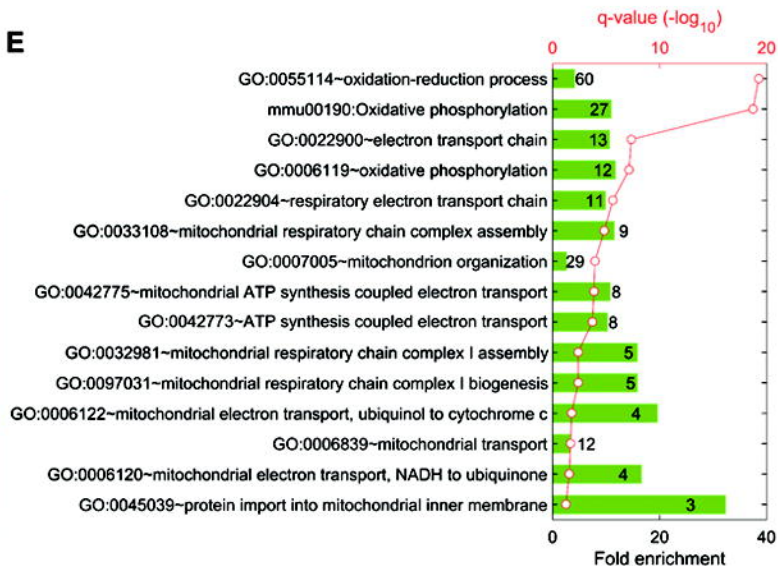

## 1 **Figure Legends**

2 **Figure 1:** Hepatic tumor in autophagy-deficient livers are derived from autophagy-deficient  
3 hepatocytes. (A) Immunoblot analysis of autophagy function-related proteins (ATG7, SQSTM1,  
4 LC3B-I/II) and NRF2 pathway-related proteins(NQO1) in whole livers isolated from 15-month  
5 old *Atg7F/F*, and *Atg7-/-* mice. (B) Schematic representation of the non-tumor, peri-tumor, and  
6 tumor region of the liver sections. Region 1 and Region 5: peri-tumor region, Region 2-Region  
7 4: tumor region, and Region 6- Region 8: non-tumor region. (C-E) Livers from 12-month old  
8 mice of *Atg7-/-* genotype were sectioned and immunostained with anti-SQSTM1(C), Anti-  
9 Ubiquitin (UB) (D), or anti-HNF4 $\alpha$  (E). Dotted lines indicate the tumor border. (F) Magnified  
10 image of the region 1(peri- and intra-tumor region) of panels C, D, & E. (G) The hepatic mRNA  
11 expression level of NRF2 target genes, *Nqo1* and *Gstm1*, in the livers of 15-month old *Atg7F/F*,  
12 and in the non-tumor and tumor samples from the liver of age-matched *Atg7-/-* mice. NT, non-  
13 tumor, T, tumor. Data are reported as mean $\pm$  SE,\*  $P<0.05$ ; n=3 mice per group.

14  
15 **Figure 2.** Hepatic Progenitor Cells and fibrosis are localized exclusively in peri-tumor and non-  
16 tumor regions but are absent inside the tumor. Liver sections from 12-month old mice of the  
17 *Atg7-/-* genotype were subjected to H-E staining (A) (original magnification, X200) and  
18 immunostaining for CK19 (B), SOX9 (C), Desmin immunostaining (D), Sirius Red stain (E), or  
19 Trichrome stain (F) (original magnification, X200). Dotted lines indicate the tumor border. NT,  
20 non-tumor, T, tumor.

21  
22 **Figure 3.** Macrophages but not other immune cells are found within the tumor. Liver sections  
23 from 12-month old mice of *Atg7-/-* genotype were subjected to immunohistochemistry staining

24 for F4/80 (A), Myeloperoxidase (MPO) (B), CD3 (C) and, CD45R (D) (original magnification,  
25 X100). Dotted lines indicate the tumor border. (E) The hepatic mRNA expression level of  
26 immune cell-associated genes in 15-month old *Atg7F/F* and *Atg7-/-* liver tissues. NT, non-tumor,  
27 T, tumor. Data are reported as mean± SE, \*  $P < 0.05$ , \*\*  $P < 0.01$ , \*\*\*  $P < 0.001$ , n.s.: no  
28 significance; n=3 mice per group.

29  
30 **Figure 4.** Hepatic HMGB1 is absent in the tumor of autophagy-deficient livers. (A) Livers of 15-  
31 month old mice of different genotypes were examined for HMGB1 by immunoblotting assay.  
32 (B) Liver sections from 15-month old mice of different genotypes were immunostained with  
33 anti-HMGB1 and anti-SQSTM1. White dotted lines indicate the tumor border. White arrowhead  
34 indicates the hepatocytes without nuclear HMGB1. (C) The hepatic mRNA expression level of  
35 *Hmgb1* in 15-month old *Atg7F/F* and *Atg7-/-* mice, determined by real-time PCR. NT, non-  
36 tumor, T, tumor. Data are reported as mean± SE, n.s., no significance; n=3 mice per group.

37  
38 **Figure 5.** Loss of HMGB1 in hepatocytes correlates with reduced proliferation in the tumor. (A-  
39 B) Liver sections from 15-month old mice of different genotypes were immunostained with anti-  
40 PCNA(A), or anti-Cyclin D (B). White arrow indicated proliferating hepatocytes. White dotted  
41 lines indicate the tumor border. (C) Immunoblot analysis of PCNA, cyclin D1, and cyclin E  
42 proteins in the tumor or non-tumor sample of 15-month old *Atg7-/-* and, *Atg7-/-/Hmgb1-/-* mice.  
43 (D) Densitometry qualification of the indicated proteins. (E) The hepatic mRNA level of  
44 indicated genes were determined in the indicated tissues of 15-month old mice of different  
45 genotypes, determined by real-time PCR. NT, non-tumor, T, tumor. Data are reported as mean±  
46 SE, \*  $P < 0.05$ , \*\*  $P < 0.01$ , n.s., no significance; n=3 mice per group.

47  
48 **Figure 6.** Genetic loss of *Rage* inhibits tumorigenesis in autophagy-deficient livers. (A) Gross  
49 images of representative livers of 12-month old *Atg7*<sup>-/-</sup>, *Atg7*<sup>-/-</sup>/*Hmgb1*<sup>-/-</sup>, *Atg7*<sup>-/-</sup>/*Rage*<sup>-/-</sup>, and  
50 *Rage*<sup>-/-</sup> mice. (B) Average number and size distribution of the tumors observed in the livers of  
51 12-month old mice of different genotypes. (C-D) Liver sections from 12-month old mice of  
52 different genotypes were immunostained with anti-PCNA(C), or anti-Cyclin D (D). White dotted  
53 lines indicate the tumor border. NT, non-tumor, T, tumor. Data are reported as mean± SE,\*  
54  $P<0.05$ , \*\*  $P<0.01$ , \*\*\*  $P<0.001$ , n.s., no significance; n=3 mice per group. Size information of  
55 the tumor from *Atg7*<sup>-/-</sup>/*Hmgb1*<sup>-/-</sup> livers is derived from what we has previously reported<sup>2</sup>.

56  
57 **Figure 7.** RAGE is expressed by ductular cells and Kupffer's cells but not by hepatocytes or  
58 stellate cells. (A) Immunofluorescence staining for RAGE antigen in the livers of 9-week old  
59 mice of *Atg7*<sup>F/F</sup> and *Atg7*<sup>-/-</sup> genotype. Framed ares are enlarged and shown in separate panels  
60 (a,b). (B) Liver sections from 9-week old *Atg7*<sup>-/-</sup> mice were coimmunostained with anti-RAGE,  
61 together with anti-CK19 or SOX9 or F4/80 or Desmin. White arrows indcate cells with  
62 colocalized signals.

63  
64 **Figure 8.** RNAseq analysis indicates transcriptomic differences in the hepatic tumors of *Atg7*<sup>-/-</sup>  
65 mice and *Atg7*<sup>-/-</sup>/*Hmgb1*<sup>-/-</sup> mice. (A). PCA of transcriptomic data based on 12 RNA-seq  
66 samples under the four indicated combinations of genotypes and tissue types. (B-C). Numbers of  
67 DEGs that are significantly up-regulated (B) or down-regulated (C) ( $p<0.01$ ) in the tumor  
68 samples of *Atg7*<sup>-/-</sup>/*Hmgb1*<sup>-/-</sup> and/or *Atg7*<sup>-/-</sup> mice. The p-values are indicated for the overlap  
69 between the two groups of upregulated or downregulated DEGs, respectively. (D). GO biological



70 processes significantly over-represented in the non-overlapped 256 DEGs uniquely elevated in  
71 the tumor samples of the *Atg7*<sup>-/-</sup> mice. (E). GO biological processes and KEGG pathways  
72 significantly enriched in the non-overlapped 288 DEGs uniquely repressed in the tumor sampels  
73 of the *Atg7*<sup>-/-</sup>/*Hmgb1*<sup>-/-</sup> mice. For D and E, the heights of bars indicate the fold enrichment  
74 compared to random selection, whereas the red dots represent the statistical significance, p-value  
75 after FDR-adjusted multiple test correction. The numbers in the bars represent the numbers of  
76 DEGs in the particular group which are associated with corresponding GO terms.

77

78

79
